# Supplementary material for: Dissecting Selective Signatures and Candidate Genes in Grandparent Lines Subject to High Selection Pressure for Broiler Production and in a Local Russian Chicken Breed of Ushanka
Source: MDPI journal article supplement (doi:10.3390/genes15040524), 2024-04-22
Supplement: s1 [file s1]

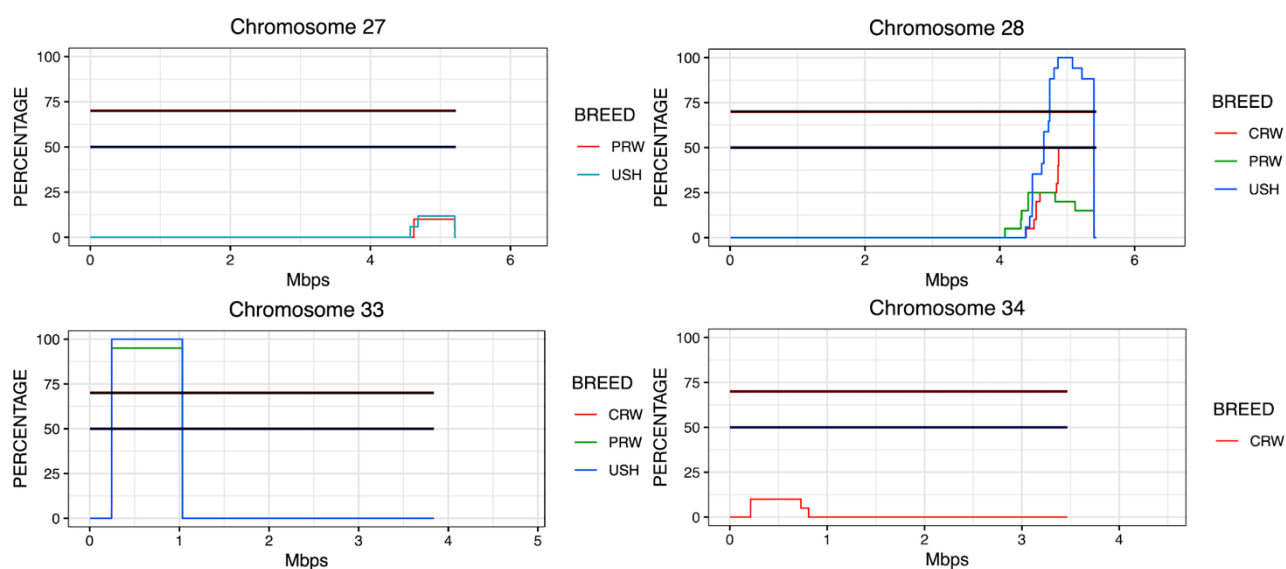

**Supplementary Figure S5.** The percentage of SNPs within a ROH island on chromosomes GGA1–GGA15, GGA17–GGA24, GGA26–GGA28, GGA33 and GGA34. X-axis: genetic distance (Mbps); Y-axis: percentage of SNPs detected within a ROH island. Blue line shows 50% threshold, and red line conforms to 70% threshold.
