# Supplementary material for: Dissecting Selective Signatures and Candidate Genes in Grandparent Lines Subject to High Selection Pressure for Broiler Production and in a Local Russian Chicken Breed of Ushanka
Source: MDPI journal article supplement (doi:10.3390/genes15040524), 2024-04-22
Supplement: s1 [file s1]

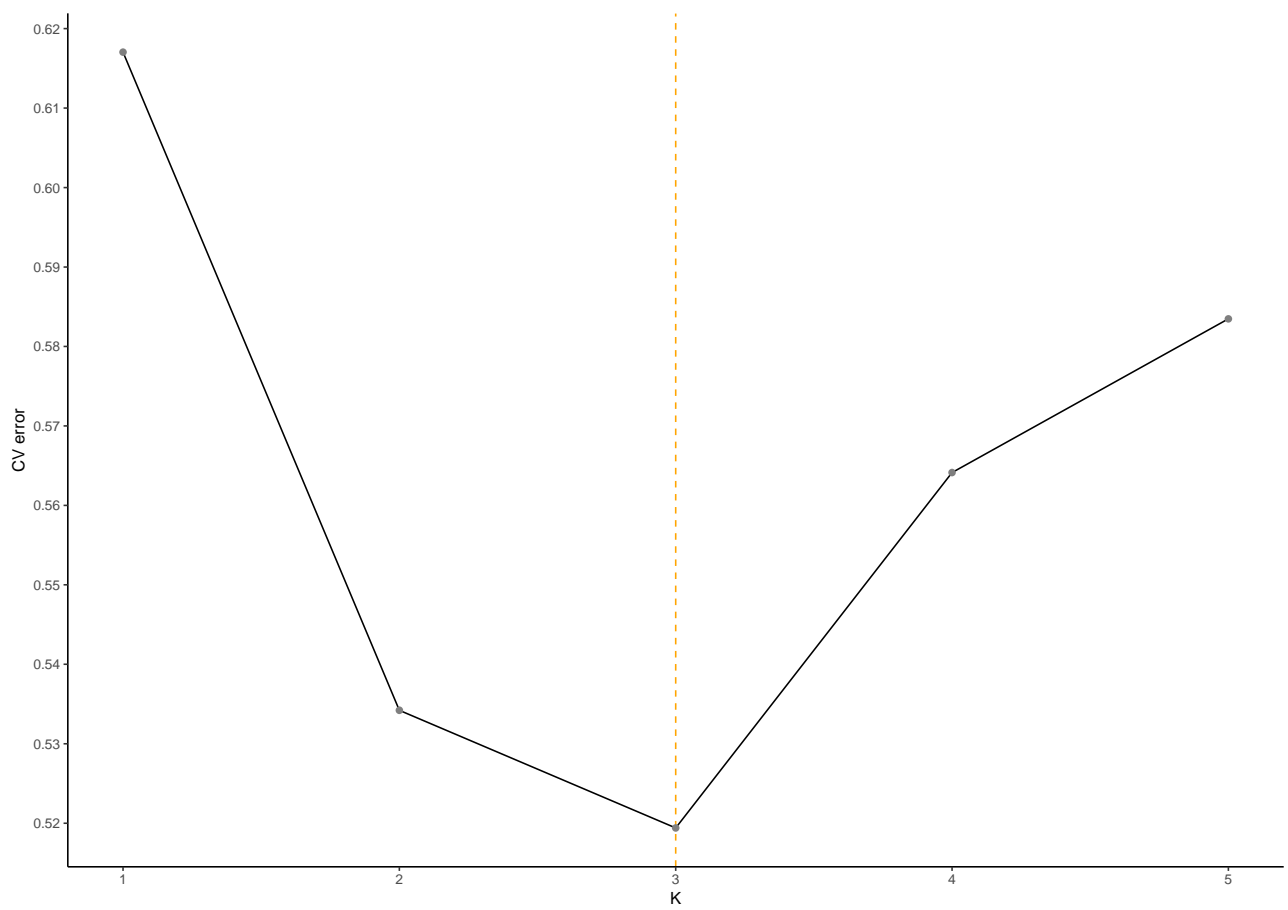

**Supplementary Figure S1.** Estimation of the number of assumed ancestral populations (K) on the basis of the lowest cross-validation (CV) error. X-axis: K, number of ancestral populations; Y-axis: values of CV error.
