# Supplementary material for: Dissecting Selective Signatures and Candidate Genes in Grandparent Lines Subject to High Selection Pressure for Broiler Production and in a Local Russian Chicken Breed of Ushanka
Source: MDPI journal article supplement (doi:10.3390/genes15040524), 2024-04-22
Supplement: s1 [file s1]

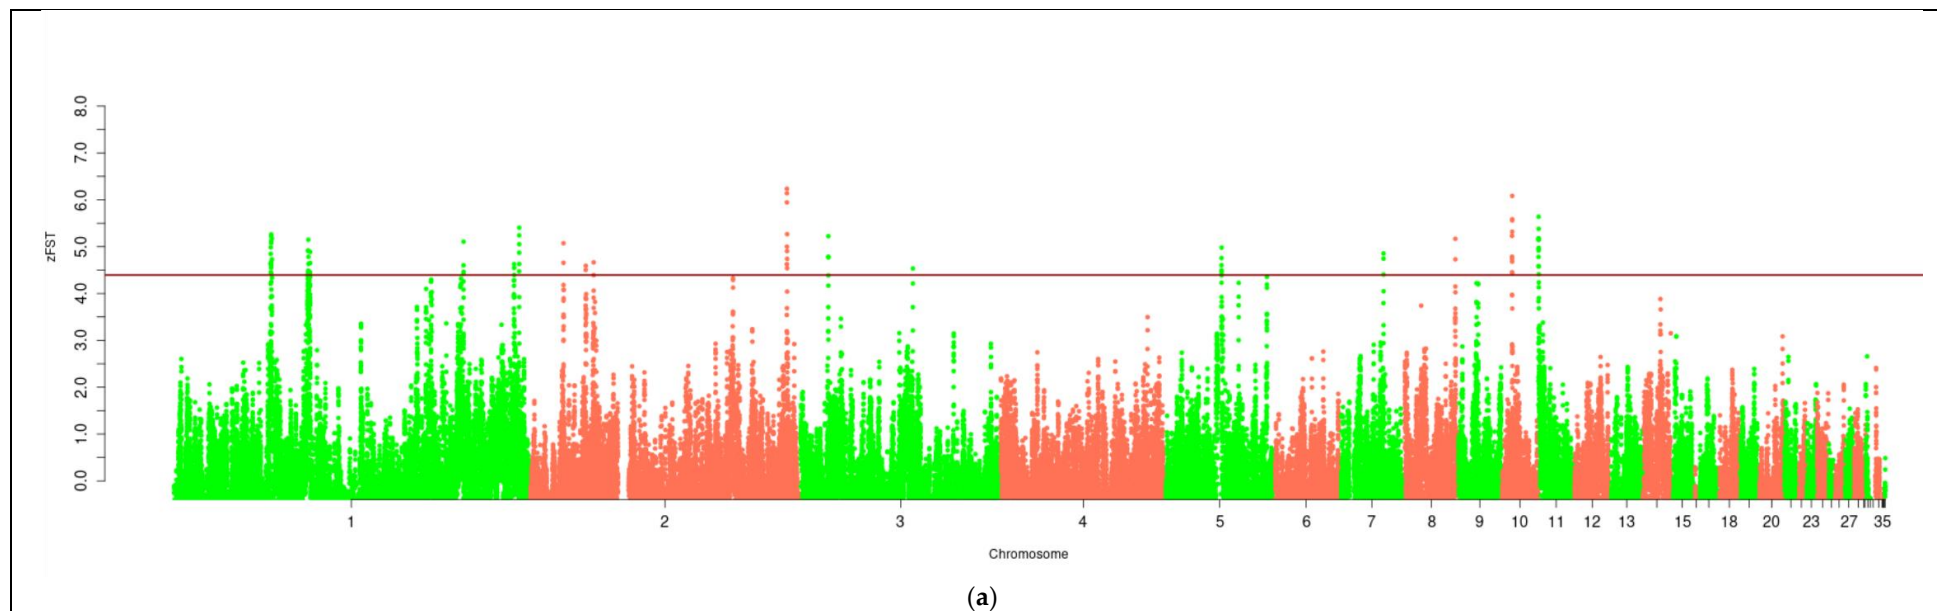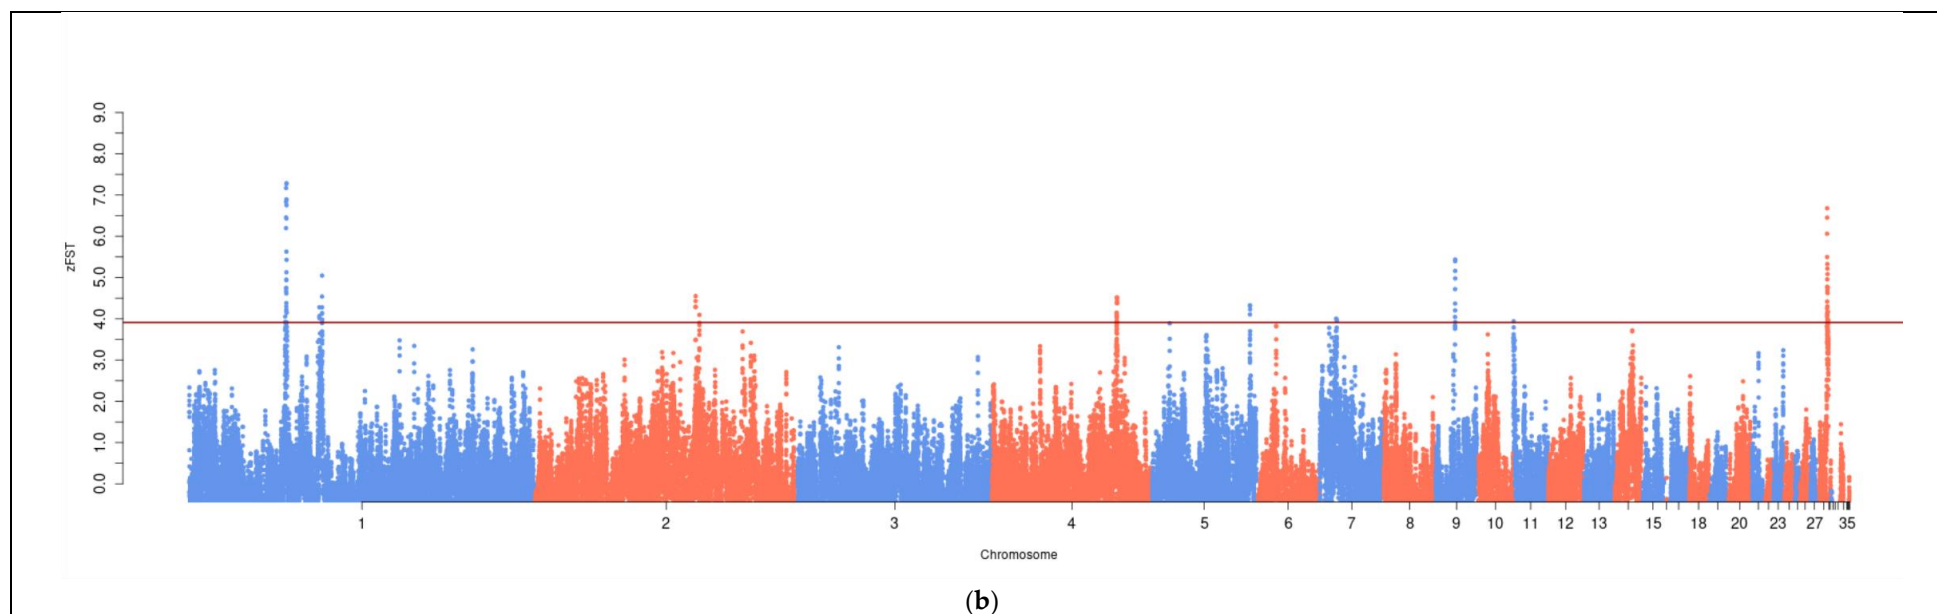

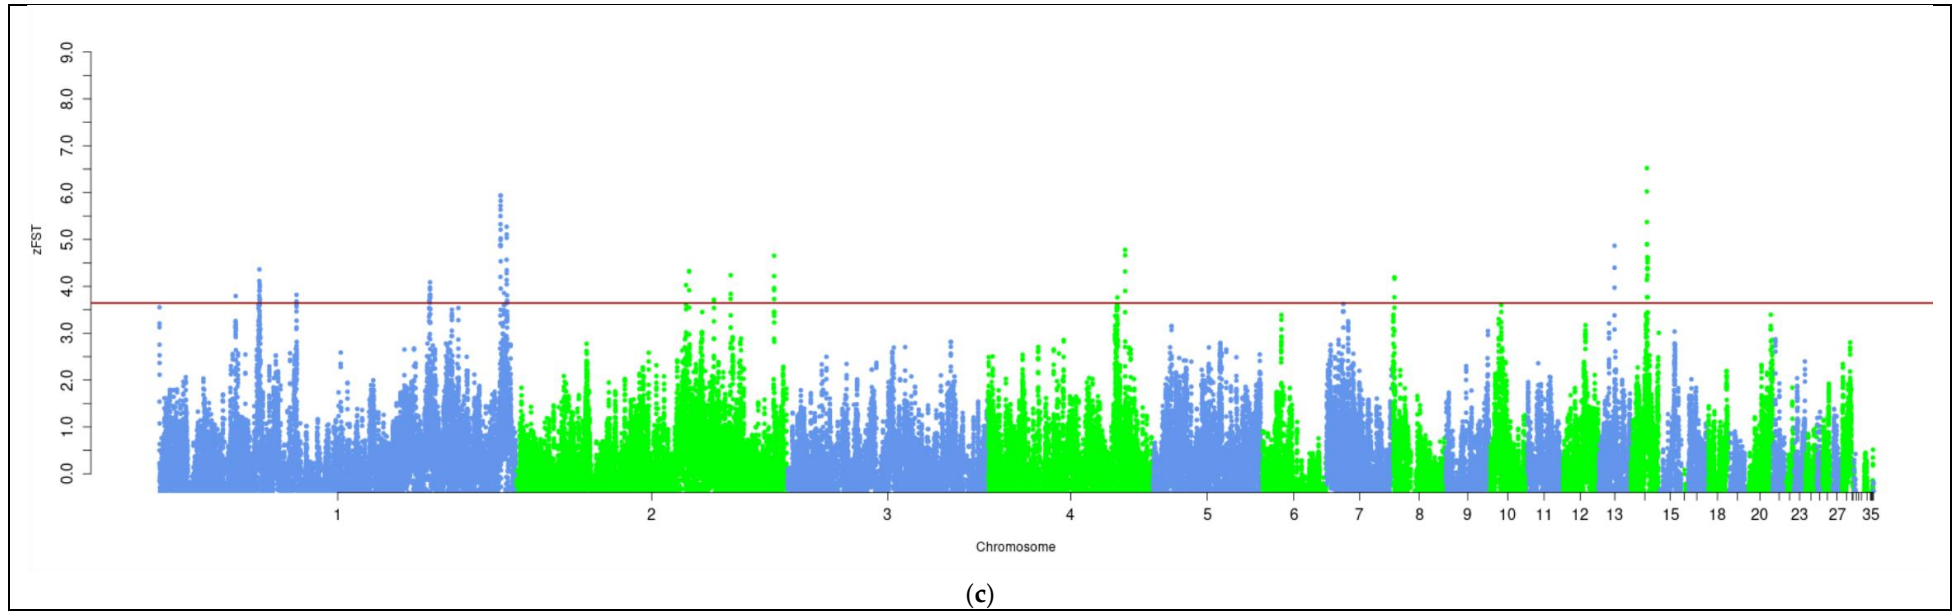

**Supplementary Figure S3.** Manhattan plots for genomic distribution of  $zF_{ST}$  values estimated between the Cornish White (CRW), Plymouth Rock White (PRW) and Ushanka (USH) breeds. Values for the X-axis are chicken autosomes (breadth of autosomes corresponds to their length) and those for the Y-axis are  $zF_{ST}$  values. SNPs were plotted relative to their positions within each autosome. The threshold, which was estimated as the top 0.1% for  $zF_{ST}$  values, is indicated by a horizontal line. Breeds: (a) CW vs. PRW; (b) CW vs. USH; (c) PRW vs. USH.
