# Supplementary material for: Dissecting Selective Signatures and Candidate Genes in Grandparent Lines Subject to High Selection Pressure for Broiler Production and in a Local Russian Chicken Breed of Ushanka
Source: MDPI journal article supplement (doi:10.3390/genes15040524), 2024-04-22
Supplement: s1 [file s1]

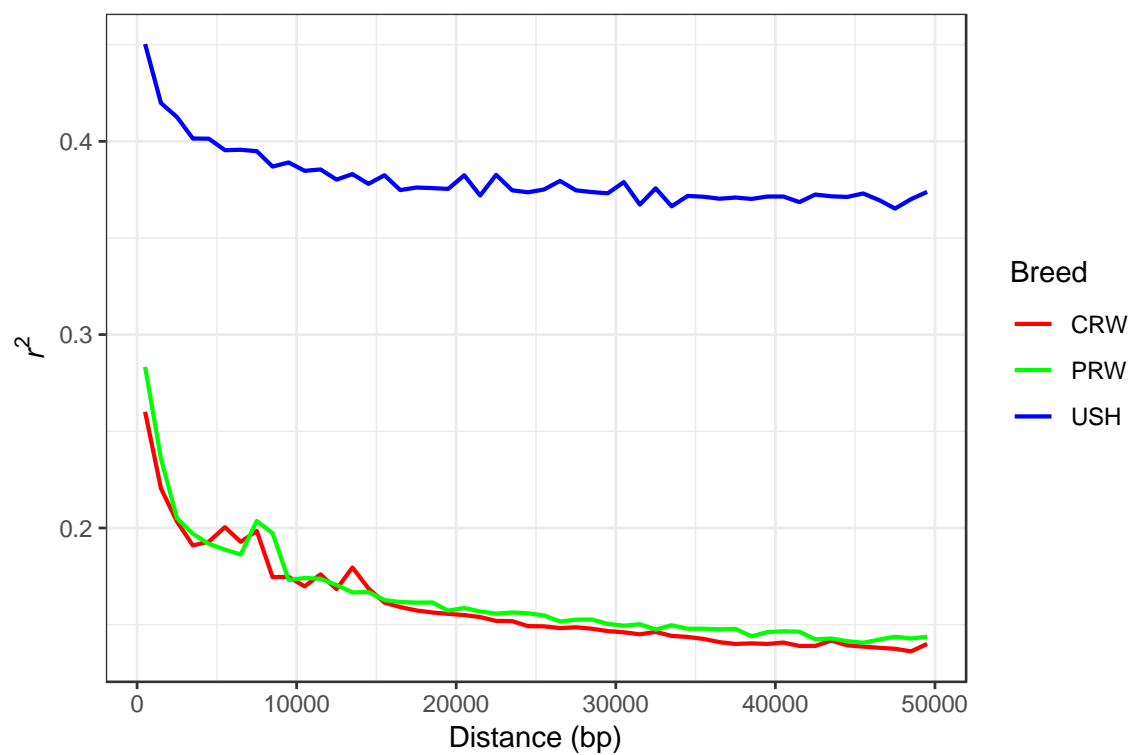

**Supplementary Figure S2.** The relationship between the linkage disequilibrium (LD) correlation coefficient and the distance between marker pairs. X-axis: genetic distance between marker pairs (bp), Y-axis: LD values measured as  $r^2$  between pairs of polymorphic marker loci.
