# Supplementary material for: Dissecting Selective Signatures and Candidate Genes in Grandparent Lines Subject to High Selection Pressure for Broiler Production and in a Local Russian Chicken Breed of Ushanka
Source: Genes (Basel). 2024 Apr 22;15(4):524. doi: 10.3390/genes15040524 (PMC11050503; doi:10.3390/genes15040524)
Supplement: Supplementary file 1 [file genes-15-00524-s001.zip]

Archive with 10 entries (10 files):
- Supplementary Figure S1 (best K).pdf
- Supplementary Figure S2 (LD decay 50K).pdf
- Supplementary Figure S3 (FST manhattan).pdf
- Supplementary Figure S4 (hapFLK).pdf
- Supplementary Figure S5 (SNPs in Runs).pdf
- Supplementary Table S1 (zFST).xlsx
- Supplementary Table S2 (hapFLK).xlsx
- Supplementary Table S3 (ROH islands).xlsx
- Supplementary Table S4a&b(ROH num & length).xlsx
- Supplementary Table S5 (QTLs).xlsx
