# Supplementary material for: Dissecting Selective Signatures and Candidate Genes in Grandparent Lines Subject to High Selection Pressure for Broiler Production and in a Local Russian Chicken Breed of Ushanka
Source: Genes (Basel). 2024 Apr 22;15(4):524. doi: 10.3390/genes15040524 (PMC11050503; doi:10.3390/genes15040524)
Supplement: Supplementary file 1 [file genes-15-00524-s001.zip › Supplementary Table S1 (zFST).xlsx]

## Sheet: zFST
Supplementary Table S1. Mean zFST values and blocks of SNPs joined by two or more top 0.1% neighbored SNPs at pairwise comparison of the three breeds. Breeds: PRW, Plymouth Rock White; USH, Ushanka; CW, Cornish White. Regions identified in several pairs of breeds are shown in bold.
CROM	BIN_START	BIN_END	N_VARIANTS	MEAN_FST	Breeds	Genes
1	42000001	42050000	149	0.576989	PRW/USH
1	53740001	53790000	965	0.371714	CRW/PRW	RFX4
1	53750001	53800000	814	0.384426	CRW/PRW	RFX4
1	53760001	53810000	862	0.372078	CRW/PRW	RFX4
1	53770001	53820000	930	0.392869	CRW/PRW	RFX4
1	53780001	53830000	852	0.360384	CRW/PRW	RFX4
1	53970001	54020000	637	0.36949	CRW/PRW	NUAK1
1	53980001	54030000	587	0.366316	CRW/PRW
1	53990001	54040000	551	0.398643	CRW/PRW
1	54000001	54050000	542	0.407551	CRW/PRW
1	54010001	54060000	596	0.409649	CRW/PRW
1	54020001	54070000	603	0.400881	CRW/PRW
1	54030001	54080000	612	0.37405	CRW/PRW
1	54040001	54090000	660	0.359527	CRW/PRW
1	54410001	54460000	811	0.37727	CRW/PRW	CHST11
1	54420001	54470000	729	0.404483	CRW/PRW	CHST11
1	54530001	54580000	1040	0.602406	CRW/USH	CHST11
1	54540001	54590000	1056	0.615461	CRW/USH	CHST11
1	55020001	55070000	421	0.683695	CRW/USH
1	55020001	55070000	473	0.577863	PRW/USH
1	55030001	55080000	397	0.828886	CRW/USH
1	55030001	55080000	521	0.60825	PRW/USH
1	55040001	55090000	397	0.892227	CRW/USH
1	55040001	55090000	541	0.632538	PRW/USH
1	55050001	55100000	340	0.925698	CRW/USH
1	55050001	55100000	519	0.587497	PRW/USH
1	55060001	55110000	332	0.854606	CRW/USH
1	55070001	55120000	398	0.675973	CRW/USH	ASCL1
1	55160001	55210000	313	0.639624	CRW/USH
1	55160001	55210000	348	0.571318	PRW/USH
1	55170001	55220000	317	0.62784	CRW/USH
1	55180001	55230000	321	0.631789	CRW/USH
1	55190001	55240000	332	0.704601	CRW/USH
1	55200001	55250000	338	0.684357	CRW/USH
1	55210001	55260000	355	0.648075	CRW/USH
1	55220001	55270000	356	0.671229	CRW/USH
1	55230001	55280000	370	0.722273	CRW/USH
1	55240001	55290000	347	0.703356	CRW/USH
1	55240001	55290000	391	0.57111	PRW/USH
1	55250001	55300000	340	0.772159	CRW/USH
1	55250001	55300000	403	0.602087	PRW/USH
1	55260001	55310000	269	0.852152	CRW/USH
1	55260001	55310000	364	0.588347	PRW/USH
1	55270001	55320000	266	0.896838	CRW/USH
1	55270001	55320000	383	0.595664	PRW/USH
1	55280001	55330000	224	0.898314	CRW/USH	IGF1
1	55290001	55340000	172	0.93609	CRW/USH	IGF1
1	55300001	55350000	153	0.937379	CRW/USH	IGF1
1	55310001	55360000	190	0.884104	CRW/USH	IGF1
1	55310001	55360000	291	0.597753	PRW/USH	IGF1
1	55320001	55370000	196	0.752325	CRW/USH	IGF1
1	55320001	55370000	276	0.568095	PRW/USH	IGF1
1	55330001	55380000	247	0.601484	CRW/USH
1	55460001	55510000	640	0.624796	CRW/USH	NUP37
1	73990001	74040000	79	0.616485	CRW/USH
1	74000001	74050000	78	0.63771	CRW/USH
1	74010001	74060000	78	0.611334	CRW/USH
1	74240001	74290000	98	0.358242	CRW/PRW
1	74250001	74300000	90	0.388312	CRW/PRW
1	74480001	74530000	104	0.388698	CRW/PRW
1	74490001	74540000	100	0.402725	CRW/PRW
1	74510001	74560000	117	0.362719	CRW/PRW
1	74520001	74570000	115	0.359059	CRW/PRW
1	74550001	74600000	95	0.359339	CRW/PRW
1	74590001	74640000	106	0.362334	CRW/PRW
1	74600001	74650000	114	0.380744	CRW/PRW	VWF
1	74610001	74660000	118	0.371489	CRW/PRW	VWF
1	74620001	74670000	114	0.359423	CRW/PRW	VWF
1	75360001	75410000	90	0.360051	CRW/PRW
1	75400001	75450000	79	0.360199	CRW/PRW
1	75490001	75540000	148	0.622485	CRW/USH	TEAD4
1	75490001	75540000	157	0.565816	PRW/USH	TEAD4
1	75500001	75550000	132	0.663862	CRW/USH	TEAD4
1	75500001	75550000	149	0.563412	PRW/USH	TEAD4
1	75510001	75560000	67	0.386978	CRW/PRW	TEAD4
1	75510001	75560000	125	0.71444	CRW/USH	TEAD4
1	75510001	75560000	138	0.579394	PRW/USH	TEAD4
1	75520001	75570000	77	0.372578	CRW/PRW	TEAD4
1	75520001	75570000	130	0.637783	CRW/USH	TEAD4
1	75530001	75580000	122	0.623797	CRW/USH	FOXM1
1	75600001	75650000	115	0.6078	CRW/USH
1	148570001	148620000	519	0.566826	PRW/USH
1	149040001	149090000	665	0.563255	PRW/USH
1	149050001	149100000	622	0.577763	PRW/USH
1	149060001	149110000	650	0.595074	PRW/USH
1	149070001	149120000	634	0.571923	PRW/USH
1	149080001	149130000	657	0.574715	PRW/USH
1	149090001	149140000	657	0.590676	PRW/USH
1	149100001	149150000	666	0.60578	PRW/USH
1	149110001	149160000	630	0.580249	PRW/USH
1	160100001	160150000	362	0.35891	CRW/PRW
1	160110001	160160000	376	0.369552	CRW/PRW
1	160120001	160170000	373	0.400207	CRW/PRW
1	160130001	160180000	454	0.361028	CRW/PRW
1	187880001	187930000	592	0.616909	PRW/USH	GRM5
1	187890001	187940000	611	0.683193	PRW/USH	GRM5
1	187900001	187950000	571	0.726856	PRW/USH	GRM5
1	187910001	187960000	587	0.74372	PRW/USH	GRM5
1	187920001	187970000	524	0.765378	PRW/USH	GRM5
1	187930001	187980000	447	0.786426	PRW/USH	GRM5
1	187940001	187990000	414	0.757177	PRW/USH	GRM5
1	187950001	188000000	407	0.693931	PRW/USH	GRM5
1	187960001	188010000	390	0.68351	PRW/USH	GRM5
1	187970001	188020000	382	0.680846	PRW/USH	GRM5
1	187980001	188030000	415	0.71535	PRW/USH	GRM5
1	187990001	188040000	398	0.78666	PRW/USH	GRM5
1	188000001	188050000	477	0.7757	PRW/USH	GRM5
1	188010001	188060000	872	0.366252	CRW/PRW	GRM5
1	188010001	188060000	548	0.697367	PRW/USH	GRM5
1	188020001	188070000	865	0.371221	CRW/PRW	GRM5
1	188020001	188070000	596	0.649595	PRW/USH	GRM5
1	188030001	188080000	866	0.35713	CRW/PRW	GRM5
1	188030001	188080000	649	0.592529	PRW/USH	GRM5
1	189860001	189910000	902	0.583286	PRW/USH	DLG2
1	190820001	190870000	457	0.361835	CRW/PRW
1	190830001	190880000	448	0.385987	CRW/PRW
1	190840001	190890000	512	0.408382	CRW/PRW
1	190850001	190900000	447	0.418333	CRW/PRW
1	190860001	190910000	416	0.396949	CRW/PRW
1	190870001	190920000	329	0.37129	CRW/PRW
1	191280001	191330000	515	0.56266	PRW/USH
1	191290001	191340000	425	0.624377	PRW/USH
1	191300001	191350000	373	0.610523	PRW/USH
1	191310001	191360000	363	0.652653	PRW/USH
1	191320001	191370000	354	0.721523	PRW/USH
1	191330001	191380000	409	0.70553	PRW/USH
1	191340001	191390000	443	0.698342	PRW/USH
1	191350001	191400000	470	0.630817	PRW/USH
1	191360001	191410000	487	0.601303	PRW/USH
1	191520001	191570000	438	0.578301	PRW/USH
1	191550001	191600000	441	0.567353	PRW/USH
2	18810001	18860000	666	0.37287	CRW/PRW	MALRD1
2	18820001	18870000	636	0.398244	CRW/PRW	MALRD1
2	31100001	31150000	733	0.363595	CRW/PRW	IGF2BP3
2	31110001	31160000	754	0.368992	CRW/PRW	IGF2BP3
2	35440001	35490000	351	0.373468	CRW/PRW	KCNH8
2	91520001	91570000	795	0.638913	CRW/USH	C18orf63
2	91530001	91580000	708	0.652771	CRW/USH	C18orf63
2	91540001	91590000	683	0.638363	CRW/USH	CYB5A
2	91550001	91600000	660	0.66473	CRW/USH	CYB5A
2	93720001	93770000	344	0.619266	CRW/USH	CCDC102B
2	93720001	93770000	360	0.599763	PRW/USH	CCDC102B
2	95400001	95450000	223	0.628047	PRW/USH
2	95410001	95460000	264	0.628903	PRW/USH
2	95420001	95470000	296	0.589159	PRW/USH
2	109060001	109110000	591	0.569331	PRW/USH
2	109070001	109120000	618	0.56771	PRW/USH
2	118270001	118320000	544	0.571015	PRW/USH
2	118280001	118330000	522	0.620441	PRW/USH
2	118290001	118340000	553	0.581336	PRW/USH
2	142060001	142110000	325	0.37101	CRW/PRW	KHDRBS3
2	142070001	142120000	295	0.468786	CRW/PRW	KHDRBS3
2	142080001	142130000	267	0.463027	CRW/PRW
2	142090001	142140000	237	0.451129	CRW/PRW
2	142100001	142150000	253	0.393791	CRW/PRW
2	142170001	142220000	189	0.387902	CRW/PRW
2	142180001	142230000	200	0.409958	CRW/PRW
2	142190001	142240000	229	0.377928	CRW/PRW
2	142190001	142240000	208	0.589411	PRW/USH
2	142200001	142250000	185	0.365784	CRW/PRW
2	142200001	142250000	168	0.660979	PRW/USH
2	142210001	142260000	173	0.618553	PRW/USH
2	142220001	142270000	184	0.593468	PRW/USH
2	142230001	142280000	306	0.570711	PRW/USH
3	15380001	15430000	816	0.379864	CRW/PRW	SYNDIG1
3	15390001	15440000	813	0.407483	CRW/PRW	SYNDIG1
3	15400001	15450000	730	0.380887	CRW/PRW	SYNDIG1
3	62010001	62060000	535	0.365439	CRW/PRW
4	70790001	70840000	323	0.624303	CRW/USH
4	70800001	70850000	302	0.623989	CRW/USH
4	70810001	70860000	314	0.617899	CRW/USH
4	70820001	70870000	300	0.615563	CRW/USH
4	70850001	70900000	296	0.613076	CRW/USH
4	70860001	70910000	295	0.60306	CRW/USH
4	70870001	70920000	295	0.60502	CRW/USH
4	70980001	71030000	186	0.661215	CRW/USH
4	70990001	71040000	219	0.661189	CRW/USH
4	71000001	71050000	232	0.647939	CRW/USH
4	71010001	71060000	263	0.653989	CRW/USH
4	71020001	71070000	277	0.64766	CRW/USH
4	71140001	71190000	497	0.574077	PRW/USH	PCDH7
4	75380001	75430000	534	0.628169	PRW/USH	LCORL, NCAPG
4	75390001	75440000	506	0.662142	PRW/USH	LCORL, NCAPG
4	75400001	75450000	461	0.673337	PRW/USH	LCORL, NCAPG
4	75410001	75460000	609	0.587491	PRW/USH	NCAPG
5	30760001	30810000	395	0.379022	CRW/PRW	MEIS2
5	30770001	30820000	457	0.363182	CRW/PRW	MEIS2
5	30790001	30840000	530	0.358283	CRW/PRW	MEIS2
5	30800001	30850000	476	0.369722	CRW/PRW	MEIS2
5	30820001	30870000	335	0.361719	CRW/PRW	MEIS2
5	30830001	30880000	298	0.392542	CRW/PRW	MEIS2
5	55740001	55790000	681	0.620409	CRW/USH	TBPL2, ATG14
5	55750001	55800000	663	0.641629	CRW/USH	TBPL2, ATG14, FBXO34
5	55760001	55810000	713	0.642327	CRW/USH	TBPL2, ATG14, FBXO34
5	55820001	55870000	659	0.63274	CRW/USH	DLGAP5, LGALS3, MAPK1IP1L
7	9270001	9320000	572	0.610333	CRW/USH	DNAH7
7	9670001	9720000	637	0.607379	CRW/USH	ANKRD44
7	9680001	9730000	667	0.605084	CRW/USH	ANKRD44
7	24660001	24710000	352	0.357635	CRW/PRW
7	24670001	24720000	380	0.378209	CRW/PRW
7	24680001	24730000	374	0.384968	CRW/PRW
8	1070001	1120000	526	0.613343	PRW/USH	VAV3
8	1080001	1130000	557	0.615766	PRW/USH	VAV3
8	1090001	1140000	641	0.574494	PRW/USH	VAV3
8	27960001	28010000	502	0.403999	CRW/PRW	DNAJC6, LEPROT
8	27970001	28020000	521	0.377315	CRW/PRW	LEPROT
9	11000001	11050000	409	0.614409	CRW/USH
9	11030001	11080000	275	0.646815	CRW/USH
9	11040001	11090000	271	0.630357	CRW/USH
9	11050001	11100000	328	0.6815	CRW/USH
9	11060001	11110000	313	0.725545	CRW/USH
9	11070001	11120000	277	0.753057	CRW/USH
9	11080001	11130000	248	0.749057	CRW/USH
9	11090001	11140000	238	0.707351	CRW/USH
9	11100001	11150000	178	0.601964	CRW/USH
10	5920001	5970000	390	0.360587	CRW/PRW	FAM189A1
10	5930001	5980000	389	0.407842	CRW/PRW	FAM189A1
10	5940001	5990000	394	0.380776	CRW/PRW	FAM189A1
10	5950001	6000000	358	0.377979	CRW/PRW	FAM189A1
10	5980001	6030000	552	0.374387	CRW/PRW
10	5990001	6040000	618	0.413085	CRW/PRW
10	6000001	6050000	654	0.427767	CRW/PRW	TJP1
10	6010001	6060000	645	0.459517	CRW/PRW	TJP1
10	6020001	6070000	585	0.429334	CRW/PRW	TJP1
10	6030001	6080000	549	0.35941	CRW/PRW	TJP1
11	70001	120000	407	0.368683	CRW/PRW
11	80001	130000	385	0.380506	CRW/PRW
11	90001	140000	393	0.390989	CRW/PRW	SMPD3
11	100001	150000	340	0.40432	CRW/PRW	SMPD3
11	110001	160000	345	0.402782	CRW/PRW	SMPD3
11	120001	170000	354	0.388708	CRW/PRW	SMPD3
11	130001	180000	353	0.404612	CRW/PRW	SMPD3
11	140001	190000	362	0.432514	CRW/PRW	SMPD3
11	140001	190000	358	0.60389	CRW/USH	SMPD3
11	150001	200000	407	0.417024	CRW/PRW	SMPD3
11	160001	210000	395	0.402664	CRW/PRW	SMPD3
11	170001	220000	425	0.392116	CRW/PRW	SMPD3
11	180001	230000	433	0.368207	CRW/PRW	SMPD3
11	200001	250000	361	0.358102	CRW/PRW
13	8850001	8900000	400	0.594234	PRW/USH
13	8860001	8910000	358	0.636019	PRW/USH
13	8870001	8920000	365	0.681847	PRW/USH
14	8790001	8840000	480	0.610367	PRW/USH	KDELR2, DAGLB, RAC1
14	8800001	8850000	403	0.684286	PRW/USH	KDELR2, DAGLB, RAC1
14	8810001	8860000	312	0.795137	PRW/USH	DAGLB, RAC1
14	8820001	8870000	330	0.843932	PRW/USH	RAC1, CYTH3
14	8830001	8880000	412	0.731299	PRW/USH	CYTH3
14	8840001	8890000	525	0.685371	PRW/USH	CYTH3
14	8850001	8900000	747	0.613017	PRW/USH	CYTH3
14	8860001	8910000	824	0.574905	PRW/USH	CYTH3
14	9080001	9130000	556	0.574524	PRW/USH	TVP23A, NUBP1
14	9090001	9140000	560	0.634788	PRW/USH	TVP23A, NUBP1, TEKT5
14	9100001	9150000	519	0.632937	PRW/USH	TVP23A, NUBP1, TEKT5
14	9110001	9160000	525	0.657431	PRW/USH	TVP23A, NUBP1, TEKT5
14	9120001	9170000	525	0.657688	PRW/USH	NUBP1, TEKT5
14	9130001	9180000	486	0.647048	PRW/USH	NUBP1, TEKT5
14	9140001	9190000	442	0.635115	PRW/USH	NUBP1
14	9150001	9200000	422	0.652386	PRW/USH	NUBP1
14	9160001	9210000	496	0.620393	PRW/USH	EMP2
14	9170001	9220000	520	0.57462	PRW/USH	EMP2
28	4570001	4620000	548	0.621276	CRW/USH	USE1, MYO9B
28	4580001	4630000	537	0.614714	CRW/USH	USE1, MYO9B
28	4600001	4650000	439	0.634998	CRW/USH	USE1, MYO9B, HAUS8
28	4610001	4660000	429	0.687249	CRW/USH	HAUS8, CPAMD8
28	4620001	4670000	379	0.759141	CRW/USH	HAUS8, CPAMD8
28	4630001	4680000	351	0.815292	CRW/USH	HAUS8, CPAMD8
28	4640001	4690000	340	0.876862	CRW/USH	HAUS8, CPAMD8
28	4650001	4700000	369	0.854204	CRW/USH	CPAMD8
28	4660001	4710000	392	0.70526	CRW/USH	F2RL3, SIN3B
28	4670001	4720000	409	0.651704	CRW/USH	F2RL3, SIN3B
28	4760001	4810000	341	0.618554	CRW/USH	CHERP, C19orf44, CALR3
28	4770001	4820000	287	0.6781	CRW/USH	C19orf44, CALR3
28	4780001	4830000	282	0.742241	CRW/USH	CALR3
28	4790001	4840000	245	0.731153	CRW/USH	KLF2
28	4800001	4850000	284	0.639962	CRW/USH	KLF2
28	4860001	4910000	366	0.686521	CRW/USH	FAM32A, CIB3, RAB8A
28	4870001	4920000	316	0.717935	CRW/USH	TPM4, TINCR
28	4880001	4930000	317	0.684937	CRW/USH	TINCR
28	4890001	4940000	301	0.67211	CRW/USH	TINCR
28	4900001	4950000	237	0.626342	CRW/USH
28	4920001	4970000	200	0.602261	CRW/USH
28	5000001	5050000	348	0.607567	CRW/USH
28	5010001	5060000	374	0.60707	CRW/USH	PTPRS
28	5020001	5070000	451	0.607063	CRW/USH	PTPRS
28	5030001	5080000	467	0.626337	CRW/USH	PTPRS
