# Supplementary material for: Dissecting Selective Signatures and Candidate Genes in Grandparent Lines Subject to High Selection Pressure for Broiler Production and in a Local Russian Chicken Breed of Ushanka
Source: Genes (Basel). 2024 Apr 22;15(4):524. doi: 10.3390/genes15040524 (PMC11050503; doi:10.3390/genes15040524)
Supplement: Supplementary file 1 [file genes-15-00524-s001.zip › Supplementary Table S2 (hapFLK).xlsx]

## Sheet: Sheet1
Supplementary Table S2. HapFLK regions identified in genome of the studied chicken populations.
chrom	start	end	Group	Method	Genes
1	53119864	53212505	CRW	hapflk	SYN3, TIMP3
1	53637245	54504503	PRW	hapflk	NUAK1, C12orf75, MTERF2, TMEM263, RIC8B, RFX4, POLR3B, CRY1, APPL2, WASHC4, ALDH1L2, SLC41A2, CHST11, TCP11X2, CKAP4, gga-mir-12210
6	8693825	8814126	USH	hapflk	KROX20, ADO
16	2090051	2170380	USH	hapflk	IL4I1, TRIM7.1, SLURP1, TRIM39.2, TRIM27.2, TRIM39.1, TRIM27.1, TRIM41, RACK1, BG1
16	2230563	2248418	USH	hapflk	CENPA, CYP21A1
31	626104	665706	PRW	hapflk
