# Supplementary material for: Dissecting Selective Signatures and Candidate Genes in Grandparent Lines Subject to High Selection Pressure for Broiler Production and in a Local Russian Chicken Breed of Ushanka
Source: Genes (Basel). 2024 Apr 22;15(4):524. doi: 10.3390/genes15040524 (PMC11050503; doi:10.3390/genes15040524)
Supplement: Supplementary file 1 [file genes-15-00524-s001.zip › Supplementary Table S3 (ROH islands).xlsx]

## Sheet: Sheet 1
Supplementary Table S3. ROH islands identified in genome of the studied chicken populations.
chrom	from	to	Start_SNP	End_SNP	nSNP	Breed	Genes
1	8415501	9428932	1:8415501:T:C	rs739119815	6521	USH	SEMA3D, SEMA3A
1	9429947	9430123	rs313208274	rs733330904	3	USH	SEMA3A
1	24507438	25180164	rs734837322	1:25180164:T:C	9490	USH	CTTNBP2, CFTR, ASZ1, LSM8, WNT2 CAPZA2, MET, ST7
1	55266291	55354497	1:55266291:A:G	rs316133787	337	PRW	IGF1
1	62577853	63910678	1:62577853:A:G	1:63910678:T:A	15452	USH	RERG, PTPRO, MGST1, EPS8, STRAP, DERA, SLC15A5, LMO3
1	64168728	64591099	1:64168728:T:C	rs313640063	5253	USH	PLCZ1, PLEKHA5, CAPZA3
1	64591185	64665342	rs732998670	rs317098799	1191	USH	AEBP2
1	64665376	64675174	rs317519908	rs316804197	157	USH	-
1	64675373	65337165	1:64675373:G:A	rs15297587	6895	USH	SLCO1A2, IAPP, PDE3A, SLCO1B3, SLCO1B1, SLCO1C1
1	108251139	108621856	1:108251139:G:T	rs740242105	5319	USH	DSCAM,
1	116446098	117537107	rs316417156	1:117537107:T:C	7213	USH	U1
1	117751720	118435487	rs1059954771	1:118435487:T:C	11261	USH	ARX, POLA1, PCYT1B, PDK3, SLC51AL, ZFX, EIF2S3, KLHL15, APOO, SAT1, ACOT9
1	127353251	127906560	rs318075135	rs317967869	2195	USH	-
1	133062596	133259293	rs317515043	1:133259293:A:G	2676	USH	LONRF2, CHST10, NMS, gga-mir-6559
1	133259305	133292859	rs317714265	1:133292859:G:T	725	USH	PDCL3
1	133293175	133303045	1:133293175:A:T	1:133303045:C:T	72	USH	-
1	133303073	133349162	1:133303073:C:T	1:133349162:C:T	544	USH	-
1	133349196	133686748	1:133349196:C:A	1:133686748:G:A	5057	USH	NPAS2, RPL31, TBC1D8, CNOT11, RNF149, CREG2, RFX8, MAP4K4, SNORD89
1	136922543	137017354	1:136922543:G:A	rs14893775	1824	USH	UPF3A, CDC16, RASA3
1	137359159	138419287	1:137359159:C:A	rs313310168	17157	USH	ATP11A, TUBGCP3, MYO16, TMCO3 DCUN1D2, GRTP1, LAMP1, CUL4A, PCID2, PROZ, F10, F7, MCF2L
1	162645331	163014055	1:162645331:C:T	rs731242549	2289	USH	-
1	163014071	163014071	rs739496276	rs739496276	1	USH	-
1	163014083	163168744	1:163014083:A:G	1:163168744:T:C	1218	USH	-
1	163169354	163612576	rs314836874	rs313378619	1653	USH	PCDH17
1	164730704	164945406	rs738951150	1:164945406:A:G	1369	USH	-
1	173399610	173456814	rs313007033	rs312288196	664	USH	-
1	173922913	174131298	rs740732571	rs13977634	3572	USH	KL
1	174131326	174224039	rs13977635	1:174224039:T:G	1183	USH	-
1	174224053	174816074	rs736829963	rs15512556	8766	USH	PDS5B, BRCA2, ZAR1L, FRY, B3GLCT
1	174816103	174857676	rs739899160	1:174857676:T:G	749	USH	HSPH1
1	174857759	174968071	rs731351655	rs737033259	1827	USH	ALOX5AP, USPL1, HMGB1
1	174968454	175153935	rs736602620	1:175153935:G:A	2465	USH	KATNAL1, gga-mir-1646
1	175154010	175937618	1:175154010:A:G	rs316087606	11939	USH	CDX2, FLT3, SLC46A3, POMP, FLT1, PAN3, UBL3, SLC7A1, gga-mir-6656
1	176651772	177399307	rs13980624	rs731237914	9925	USH	SHISA2, NUP58, MTMR6, AMER2, SPATA13 MIPEP, TNFRSF19, U6
1	177399408	177425667	rs735990378	rs738894433	408	USH	-
1	177425992	177552755	rs316498407	1:177552755:G:A	2087	USH	SACS, SGCG
1	177552841	177801607	rs317791514	rs736141362	3969	USH	-
1	177802099	177812316	rs316259842	rs738598786	71	USH	-
1	177812760	177839157	rs733298210	1:177839157:T:C	292	USH	-
1	177839295	177854101	rs1058288510	1:177854101:A:G	135	USH	-
1	178992343	179031008	1:178992343:G:C	rs1059612521	642	USH	-
1	179031106	179207665	rs1058939461	rs15523440	3006	USH	PSPC1, MPHOSPH8, PARP4, CENPJ, RNF17, gga-mir-6641
1	179207898	179447995	rs315619528	1:179447995:G:A	3785	USH	ARHGAP20, FDX1
1	179448050	179572644	1:179448050:G:T	1:179572644:C:T	1940	USH	ZC3H12C, RDX
1	180347400	180373980	1:180347400:C:T	rs317352606	488	USH	SLN
1	189117971	189572206	rs315679991	1:189572206:T:G	5202	USH	DLG2
1	190204495	191283840	1:190204495:A:G	1:191283840:G:A	9986	USH	CCDC83, PICALM, EED, HIKESHI
1	193327531	193514601	1:193327531:A:G	rs315211827	4062	USH	-
2	25044528	25196104	rs312383714	rs15076125	1012	CRW	-
2	25196120	25263396	rs15076126	rs737472268	311	CRW	-
2	31459250	31767667	rs312596086	2:31767667:C:G	4746	USH	SPMIP4, NPVF, DFNA5, OSBPL3, CYCS,
2	31767751	31795401	2:31767751:C:T	rs731493356	326	USH	-
2	35107662	35114544	rs794366499	2:35114544:T:A	31	USH	SATB1
2	35862685	36063633	2:35862685:C:T	rs314960988	1404	USH	-
2	36064453	36847108	rs794226030	rs738888304	3512	USH	ZNF385D, UBE2E2
2	38353929	39600675	rs736789919	rs15958164	15256	USH	RBMS3, EOMES, CMC1, AZI2
2	39741023	39741023	rs737111273	rs737111273	1	USH	TGFBR2
2	39741089	40543766	2:39741089:G:A	rs317278522	11441	USH	GADL1, STT3B, OSBPL10, GPD1L, CMTM8, CMTM6, gga-mir-1622, CMTM7, TCAIM, DYNC1LI1, CNOT10, TRIM71,
2	67931468	68297891	rs314137996	rs313375996	6227	USH	TNFRSF11A, RELCH, PIGN, RNF152, gga-mir-1782
2	76398462	77069293	rs315358096	2:77069293:A:C	5253	USH	U6
2	77069313	77384702	2:77069313:A:C	rs739341555	4080	USH	-
2	77384722	77389746	rs316599295	2:77389746:A:G	75	USH	-
2	77389945	77405108	2:77389945:T:G	rs734216436	259	USH	-
2	77405409	77577776	2:77405409:A:T	rs313961133	2026	USH	gga-mir-1613
2	77577986	78789574	rs312500982	2:78789574:T:G	13620	USH	SBK2, CCT5, ATPSCKMT, DAP, ANKRD33B, SNRNP48, ROPN1L, MARCH6, SEMA5A, SNORD123
2	79501335	79876816	2:79501335:A:G	rs317877075	4467	USH	C7orf57, UPP1, ABCA13
2	82125763	82253685	rs317082801	rs733582614	126	USH	-
2	83174114	83185051	2:83174114:G:T	2:83185051:A:T	157	USH	RPRD1A, C18orf21
2	83185070	83192933	rs317013577	rs13636330	139	USH	C18orf21
2	83193026	83434118	rs14211523	rs315814106	2273	USH	GALNT1 gga-mir-187
2	89545046	90366744	rs318027683	rs315948243	12832	USH	GALR1, MBP, ZNF236, FAM65B, GMNN, C2H6ORF62, ACOT13, TDP2
2	91027506	92075494	rs318097391	rs738168777	11119	USH	FAM69C, C18orf63, CYB5A, TIMM21, ZNF407, CNDP1, CNDP2 U1, FBXO15
2	92075780	93852482	rs735361419	rs734545202	9448	USH	RTTN, DOK6, TMX3, SOCS6, CCDC102B, NETO1, CBLN2, gga-mir-1803, gga-mir-1681, gga-mir-6584
2	94371804	95546512	rs1057662534	rs740288378	5055	USH	CDH7, CDH19, gga-mir-3524b
2	97368715	97904337	2:97368715:A:T	rs736324930	6786	USH	NAPG
2	99670001	100403658	rs313650713	2:100403658:G:A	9073	USH	DLGAP1, EPB41L3, ZBTB14, AKAIN1
2	100403665	102736917	2:100403665:G:T	rs312585960	31215	USH	LPIN2, TGIF1, MYL12A, EMILIN2, MYOM1, SMCHD1, NDC80, METTL4, MYL12B, CLUL1, YES1, TYMS, COLEC12, ADCYAP1, RBBP8, CABLES1, TMEM241, RIOK3, RMC1, NPC1, ANKRD29, THOC1, USP14, ROCK1, GREB1L, ESCO1, ABHD3, MIB1, GATA6, gga-mir-133a-1, gga-mir-1a-2
2	107015413	107594975	2:107015413:C:T	2:107594975:G:C	8733	USH	DTNA, MAPRE2, CEBPD, PRKDC
2	108432120	108790287	rs1058698838	2:108790287:T:G	2973	USH	SNTG1
2	115519648	115550968	rs737884433	2:115550968:T:C	685	USH	C8orf34
2	115551009	115858991	2:115551009:G:C	rs738129841	4886	USH	-
2	115859111	116164724	rs315142949	rs317956511	4381	USH	SLCO5A1, SULF1
2	121027211	121297012	rs734181160	2:121297012:C:T	4426	USH	FABP4, ZFAND1, CHMP4C, SNX16, IMPA1
2	122209219	122545158	rs738716734	rs735865403	5808	USH	SLC7A13, LRRCC1, E2F5, C8orf59, CA13 CA3A, CA3B, CA2
2	123738593	123793245	rs741376408	rs314393193	672	USH	-
2	123793344	123803014	rs738554710	rs317262886	138	USH	-
3	8277018	8303525	rs314403429	rs318045738	365	USH	-
3	8675474	9423109	rs317005077	rs312591440	12530	USH	EHBP1, PCARE, FAM179A, WDR43, TRMT61B, SPDYA, EPCAM, MSH2, KCNK12, MSH6, FBXO11, FOXN2, PPP1R21, B3GNT2, COMMD1, TMEM17
3	20981400	21020550	rs732411001	3:21020550:C:T	323	USH	-
3	21020658	21022797	3:21020658:G:A	3:21022797:C:T	42	USH	-
3	21022926	21085445	rs869003523	3:21085445:C:T	800	USH	-
3	21085496	21238980	3:21085496:T:A	3:21238980:A:T	1666	USH	-
3	21239008	21260506	rs315904276	rs738494674	232	USH	-
3	21260575	21442952	rs737737461	rs14324924	2610	USH	RPS6KC1, ANGEL2, VASH2
3	29950851	31109241	rs732596905	rs15314982	14914	USH	GTPBP2, POLH, TTC27, DLK2, ZNF318, FAM98A, RASGRP3, LTBP1, XPO5, POLR1C, YIPF3, LRRC73, HSP90AB1, SLC29A1, CAPN11, TMEM63B, MRPL14, VEGFA, MRPS18A, RSPH9, EPHX1L, MAD2L1BP, gga-mir-4732, gga-mir-12259
3	31109351	31307627	3:31109351:A:T	rs317550331	2748	USH	BIRC6, gga-mir-456
3	31307794	31368971	rs735717098	3:31368971:A:T	878	USH	YIPF4
3	36569867	38108325	3:36569867:T:A	rs737683631	17342	USH	RYR2, MTR, ACTN2, HEATR1, LGALS8, EDARADD, ERO1B, GPR137B, NID1, LYST, GNG4, B3GALNT2, TBCE, GGPS1, ARID4B, RBM34, TOMM20, IRF2BP2, gga-mir-135b
3	38108375	38850525	3:38108375:A:T	rs733644168	11467	USH	TARBP1, COA6, SLC35F3, KCNK7, MAP3K21, PCNX2, NTPCR, SIPA1L2, MAP10, U1
3	38850557	39027190	3:38850557:T:A	rs313673821	2507	USH	-
3	39027441	39201160	rs314969276	rs793980719	2577	USH	DISC1
3	39702495	40437620	rs734778685	rs316175290	11532	USH	PGBD5, COG2, AGT, CAPN9, C1orf198, TTC13, ARV1, FAM89A, TRIM67, C1orf131, PDCD2, TBP, PSMB1, TAF5L, ABCB10, URB2, GALNT2, gga-mir-12260, GNPAT
3	42791846	43192785	rs314022301	rs733397435	4420	USH	-
3	46177363	47257896	rs317419294	3:47257896:G:A	14832	USH	FBXO30, SHPRH, GRM1, RAB32, ADGB, STXBP5, SASH1
3	47257918	47257949	3:47257918:G:A	3:47257949:T:C	2	USH	SASH1
3	47258003	48048161	3:47258003:A:G	rs734642782	11485	USH	UST, ZC3H12D, PPIL4, GINM1, KATNA1, LATS1, NUP43, PCMT1, LRP11, PPP1R14C, TAB2
3	48048299	48056614	3:48048299:G:C	rs13570226	103	USH	PPP1R14C
3	56281668	56309631	rs731264236	rs739524342	334	USH	-
3	56309716	56508930	rs13572489	rs80776962	2687	USH	RPS12, SLC18B1, VNN2, TAAR1, SNORD100, SNORD101, gga-mir-1454
3	56508958	57382799	3:56508958:A:C	3:57382799:C:A	14496	USH	CCN2, TAAR5, STX7, MOXD1, ENPP1, ENPP3, MED23, AKAP7, EPB41L2, TAAR2, MSH5
3	57382808	57383130	rs732056142	3:57383130:G:A	16	USH	-
3	57383178	58200202	3:57383178:C:T	rs314309539	9361	USH	LAMA2, TMEM200A, SAMD3, L3MBTL3, TMEM244, ARHGAP18, gga-mir-6697, gga-mir-1660,
3	91126725	91794768	rs312783927	3:91794768:G:A	10554	USH	ERICH1, TDRP, FBXO25, FAM110C, SH3YL1, ACP1, FAM150B
3	96357804	96970646	rs735419906	rs312718169	8846	USH	HPCAL1, ATP6V1C2, PDIA6, KCNF1, C2orf50, SLC66A3, ROCK2, NOL10, ODC, gga-mir-1329
4	11674549	11817058	rs13643958	4:11817058:G:T	2377	USH	ARHGEF9
4	11817063	11897131	4:11817063:T:G	rs738892461	1242	USH	-
4	11897275	12205643	rs315681973	rs315475709	5083	USH	CDX4, CHIC1, RASL11AL
4	12519471	12554917	rs316800717	4:12554917:T:A	471	USH	ZDHHC15
4	12554937	12572005	rs738228788	rs735618278	281	USH	-
4	12572052	12749738	rs1058787852	4:12749738:T:G	2164	USH	FGF16
4	12749865	12794234	rs737568692	rs734968003	538	USH	ATRX
4	12794537	12934511	rs13644406	rs733612123	2266	USH	MAGT1, COX7B, ATP7A, PGK2, AMOT
4	12934726	13105067	rs317403094	rs312972785	2655	USH	TRPC5
4	13105259	13407860	rs736610280	4:13407860:A:G	5730	USH	ALG13 DCX, CAPN6, PAK3
4	13407882	13412057	4:13407882:A:C	rs731658059	60	USH	PAK3
4	13412197	13629622	rs738431907	rs312655863	2363	USH	CHRDL1, AMMECR1
4	13629685	13734749	4:13629685:C:A	4:13734749:T:A	1586	USH	ACSL4, gga-mir-6614, TMEM164
4	44403481	44895719	rs736236165	4:44895719:A:G	7882	USH	PRDM8, BMP2K, PAQR3, ANTXR2
4	44896283	44935059	4:44896283:C:T	rs741363925	813	USH	-
4	58040945	58234944	rs794289430	rs730894938	2196	USH	UNC5C, gga-mir-122b
4	58235015	59085190	rs731689611	4:59085190:G:C	9467	USH	-
4	59494898	60642298	4:59494898:G:T	rs317825449	15821	USH	TRMT10A, C4orf54, MTTP, DAPP1, LAMTOR3, DNAJB14, H2AFZ EMCN, PPP3CA, BANK1, SLC39A8, NFKB1, ADH1C, UBE2D3, CISD2, BDH2, CENPE, RSPH4A, CFAP96, PDLIM3, SORBS2, MANBA
4	69258376	70700436	rs739686055	4:70700436:C:T	11206	USH	C4orf19, NWD2, DTHD1, ARAP2, PGM2, RELL1
4	70427900	70460844	rs80678833	rs316854643	120	CRW	-
4	70462265	70739807	rs317392190	rs16432751	1124	CRW	-
4	70701554	70970711	rs740284605	rs314996899	896	USH	-
4	70740151	71008491	rs16432749	rs735683450	862	CRW	-
4	70740151	70753263	rs16432749	4:70753263:G:A	17	PRW	-
4	70754254	71145478	rs317788833	rs314832942	1338	PRW	PCDH7
4	70971231	71354713	rs316993832	4:71354713:G:C	1648	USH	PCDH7
4	71357713	71526188	rs314224984	rs735061164	726	USH	-
4	71527272	72187600	rs312412633	rs312834518	4497	USH	-
4	72188328	72219345	rs16434535	4:72219345:T:G	120	USH	-
4	72219411	72269135	4:72219411:T:C	rs317465195	204	USH	-
4	73529663	73666112	4:73529663:C:T	rs317611950	1113	USH	PPARGC1A
4	73666253	73704064	rs730956853	rs315924484	298	USH	-
4	73704105	73816904	rs735664436	rs80575288	1047	USH	-
4	73816945	74148385	4:73816945:T:A	4:74148385:T:G	3501	USH	ADGRA3, KCNIP4
4	74148447	74165083	rs314421115	rs16435876	211	USH	KCNIP4
4	74165177	74237505	rs13774712	rs313061683	670	USH	KCNIP4
4	74237760	74273769	4:74237760:T:A	rs315844045	353	USH	KCNIP4
4	74273913	74615962	rs735452038	rs736012177	2889	USH	PACRGL, SLIT2, gga-mir-218-1
4	74615999	74747748	rs739414421	4:74747748:T:C	924	USH	SLIT2,
4	74747982	74937755	rs741008238	4:74937755:G:A	1143	USH	-
4	74938839	75922825	4:74938839:A:G	rs738230317	9531	USH	LCORL, NCAPG, MED28, LAP3, CLRN2, QDPR, LDB2
4	75922853	76041040	rs315814950	rs315558723	1979	USH	PROM1, TAPT1
4	76555064	76897709	rs315122171	rs732041566	3104	USH	-
5	12373137	13125071	5:12373137:T:A	5:13125071:G:T	10977	USH	PTPRJ, OSBPL5, CARS, NAP1L4, PHLDA2, SLC22A18, CDKN1C, KCNQ1
5	13125281	13226264	rs312730925	5:13226264:T:C	1396	USH	TSSC4, TRPM5
5	13226482	13377926	rs315105551	rs314677317	2195	USH	CD81, TSPAN32, ASCL2, INS, IGF2, gga-mir-6642, TH
5	17038898	17272706	rs16473272	5:17272706:C:A	2817	USH	CCND1, ORAOV1, FGF19, FGF4, FGF3
5	17273000	18506519	rs741476123	rs313237496	15242	USH	PPFIA1, CTTN, SHANK2, ACTBL2, CD59, FBXO3, LMO2, CAPRIN1, NAT10, ABTB2, CAT, ELF5, EHF, PDHX, APIP, CD44, FADD, ANO1
5	18921719	19083285	rs731949716	rs737301814	2376	USH	COMMD9, PRR5L, TRAF6, RAG1, RAG2, C11orf74
5	20013295	20127540	rs738881811	5:20127540:A:G	503	USH	LRRC4C
5	20127567	20341915	5:20127567:A:G	5:20341915:C:T	1645	USH	LRRC4C
5	20342002	20525711	rs318007372	rs14521191	1733	USH	-
5	20526807	20544423	rs313084697	rs738352195	214	USH	-
5	20544502	20560379	rs732797732	5:20560379:T:A	90	USH	-
5	20560389	20566847	5:20560389:T:C	rs318002352	39	USH	-
5	20567109	20847548	5:20567109:C:T	rs80692402	2858	USH	-
5	30403601	30418748	rs314303476	rs313850935	14	CRW	-
5	30830467	31703025	rs14530715	rs739571020	4470	CRW	CDIN1, DPH6, ZNF770, AQR, gga-mir-1718
5	36213134	37261379	5:36213134:A:G	rs738848581	14226	USH	SLC25A21, MIPOL1, FOXA1, SSTR1, CLEC14A, SEC23A, GEMIN2, TRAPPC6A, PNN, FBXO33, ZNF410, FAM161B, COQ6, ENTPD5, ALDH6A1, LIN52
5	37261733	37757596	rs14534466	rs314889367	6927	USH	NPC2, LTBP2, ISCA2, JDP2, PROX2, AREL1, FCF1, YLPM1, DLST, RPS6KL1, PGF, EIF2B2, MLH3, ACYP1, ZC2HC1C, NEK9, TMED10, FOS, VSX2, VRTN, ABCD4, SYNDIG1L
5	42577536	42675839	rs317868356	rs738215631	1414	USH	PTPN21, ZC3H14
5	42675879	43164704	rs312898302	rs1057626744	6033	USH	FOXN3, EFCAB11, TTC8
5	56301941	56539440	5:56301941:T:G	5:56539440:C:T	947	USH	MDGA2
5	56539760	57525507	5:56539760:G:C	rs312951039	15222	USH	RPS29, LRR1, DNAAF2, POLE2, KLHDC1, KLHDC2, NEMF, ARF6, VCPKMT, SOS2, MGAT2, Metazoa_SRP, gga-mir-1716
5	58909854	59506221	5:58909854:C:A	5:59506221:G:T	4562	USH	LRFN5
6	9138567	9637151	rs16538740	rs312289281	8150	USH	TMEM26, RHOBTB1, CDK1, ANK3, 5S_rRNA
6	9637312	9672234	rs316000109	rs314057109	582	USH	ANK3
6	9672260	9801354	6:9672260:T:C	rs14571647	1618	USH	CCDC6
6	9801641	10079605	rs14571650	6:10079605:C:T	2849	USH	BKJ, RSFR, CHUK, SLC16A9, RNASE6, ERLIN1, ADAM8, TUBGCP2
6	10079663	10309782	rs733149024	rs1058142520	2802	USH	ZNF511, PRAP1, ECHS1, MTG1, PAOX, LIPML1, RNLS, PTEN, SPRN
6	10309911	10591225	rs736618819	rs736928790	3917	USH	ATAD1, PAPSS2, MINPP1, SGMS1, A1CF, PRKG1
7	779928	2867641	rs16570788	rs316601428	29623	USH	NUP35, DUSP19, NCKAP1, FRZB, MAP2, UNC80, KANSL1L, ACADL, CPS1, MYL1, GULP1, TFPI, CALCRL, FAM171B, ITGAV, ZC3H15, ZNF804A, gga-mir-1559, gga-mir-1812
7	3529816	3706356	rs314221887	rs735978941	2916	USH	-
7	3706543	3706549	7:3706543:T:C	rs313930030	3	USH	-
7	3706596	3718510	rs316079087	rs316344812	131	USH	IKZF2
7	3718641	3760310	rs316905058	7:3760310:G:A	532	USH	IKZF2
7	3760472	4566631	rs16575584	7:4566631:C:A	12315	USH	SPAG16, VWC2L, BARD1, ABCA12, ATIC, FN1
7	4566715	5044250	rs733873319	7:5044250:G:A	6911	USH	MREG, IFNL3A, IFNL3, UBE2F, RAB17, PRLH, MLPH, COL6A3, CXCR7, COPS8
7	6431091	8443989	7:6431091:A:T	rs13791428	6149	USH	MCM3AP, POFUT2, NABP1, TMEFF2, DIP2A, LSS, S100B, ADARB1, NDUFA10, AHR2, GLS2, STAT1, STAT4, MYO1B, AHR1B, COL18A1, SLC19A1, COL6A1, COL6A2, FTCD, BlSK1, PCNT, C7H21orf58, KMO, ITGB2, gga-mir-1845
7	9281277	10029387	rs737354207	rs80659833	9990	USH	SF3B1, STK17B, HECW2, GTF3C3, C7H2ORF66, PGAP1, ANKRD44, COQ10B, HSPD1, HSPE1, MOB4, RFTN2, BOLL, PLCL1
7	11602985	11684593	rs737101442	7:11684593:G:A	1237	USH	PLEKHM3
7	11684811	11765521	rs314758718	7:11765521:T:G	979	USH	FZD5
7	11765568	12318134	rs732319745	rs312453601	7993	USH	METTL21A, CREB1, KLF7 CPO, FASTKD2, MDH1B, DYTN, FAM237A, GPR1, EEF1B2, NDUFS1, INO80D, NRP2, ADAM23
7	13743496	13747681	rs313938388	rs314710359	66	USH	PPP1R1C
7	13747960	15957479	rs315784851	rs735429595	26233	USH	ITPRID2, TTN, PLEKHA3, FKBP7, PJVK, OSBPL6, RBM45 AGPS, NFE2L2, HNRNPA3, MTX2, HOXD3, HOXD4, HOXD8, HOXD9, HOXD11, HOXD12, HOXD13, EVX2, NEUROD1, CERKL, ITGA4, UBE2E3, CWC22, ZNF385B, SESTD1, CCDC141, TTC30B, gga-mir-7474, gga-mir-1713, gga-mir-10b, HOXD10
7	15957481	16011125	7:15957481:T:G	7:16011125:C:T	982	USH	LNPK
7	16011141	16273502	rs15852961	rs740536529	4033	USH	ATP5G3
7	16273510	16327853	rs739362848	rs80644745	955	USH	ATF2
7	16328043	16454586	7:16328043:A:G	rs739873638	2351	USH	CHRNA1, WIPF1, gga-mir-1570, CHN1
7	17132468	17897935	7:17132468:C:T	rs735549399	9768	USH	DLX2, DLX1, PPP1R19L, PDK1, ITGA6, METAP1D, SLC25A12, HAT1, DYNC1I2, CYBRD1, DCAF17, METTL8, TLK1, GORASP2, GAD1, SP5, MYO3B
7	17898165	18465984	rs739440527	rs16593127	5500	USH	UBR3, METTL5, SSB, KLHL23, PHOSPHO2, PPIG, FASTKD1, BBS5, LRP2
7	29224607	29649607	rs314407739	7:29649607:T:A	5368	USH	ACTR3, SLC35F5, GPR39, LYPD1, NCKAP5
7	29649652	29693903	rs731214885	rs316679605	515	USH	NCKAP5
7	29693981	29698911	rs16607307	rs315008879	64	USH	NCKAP5
7	29699053	30450323	rs313069570	rs15880787	9153	USH	DARS, CXCR4, MGAT5, TMEM163, ACMSD, CCNT2, MAP3K19, RAB3GAP1, ZRANB3, R3HDM1, UBXN4, LCT, MCM6, gga-mir-128-1
7	35122329	35364901	rs741368156	rs316631355	4221	USH	PRPF40A, GALNT13, KCNJ3, RPRM
7	35365076	35402497	rs16615351	7:35402497:T:C	681	USH	-
7	35466013	35467865	rs15891007	7:35467865:A:C	14	USH	-
7	35467869	35521120	7:35467869:C:T	7:35521120:C:A	656	USH	-
7	35521301	36329846	rs16615506	7:36329846:A:G	4850	USH	NR4A2, GPD2, ERMN, CYTIP, ACVR1C, ATVR1, UPP2, CCDC148, PKP4, TANC1, WDSUB1, BAZ2B, MARCH7, NAA20, gga-mir-6546
9	17834854	18874623	rs734433460	rs312726915	11064	USH	NAALADL2, NLGN1, SPATA16
9	21766651	21998184	rs313935920	9:21998184:C:A	3222	USH	B3GALNT1, ARL14, KPNA4, TRIM59, SMC4, IFT80, IL12A, SCARNA7, gga-mir-16-2, gga-mir-15b
9	21998396	21998928	rs737440652	9:21998928:C:T	14	USH	-
9	21998958	22319155	9:21998958:C:T	9:22319155:C:A	4968	USH	MFSD1, RARRES1, GFM1, LXN, MLF1, RSRC1, SHOX2
10	3414254	3426523	10:3414254:T:C	10:3426523:G:A	213	USH	TMEM266
10	3426550	5273934	10:3426550:G:T	rs315197270	24588	USH	NRG4, FBXO22, UBE2Q2, CHRNB4, CHRNA3, CHRNA5, PSMA4, IREB2, CRABP1, WDR61, DNAJA4, ACSBG1, IDH3A, CIB2, TBC1D2B, DAPK2, HERC1, FBXL22, USP3, CA12, RAB8B, RPS27L, LACTB, TPM1, TLN2, C2CD4A, VPS13C, RORA, ICE2, ANXA2, FOXB1, gga-mir-190a
10	5274026	5355355	rs316998526	10:5355355:T:C	790	USH	-
10	5355392	6359502	rs15568482	rs14945084	9336	USH	LRRC49, THSD4, BNIP2, GTF2A2, GCNT3, OTUD7A, KLF13, TRPM1, MTMR10, FAN1, MPHOSPH10, MCEE, APBA2, FAM189A1, TJP1, TARSL2, TM2D3, ADAL, LARP6, gga-mir-204-2, gga-mir-1574
10	8993121	9962411	rs15574085	10:9962411:T:C	11202	USH	LEO1, TMOD2, LYSMD2, SCG3, AP4E1, TNFAIP8L3, CYP19A1, GLDN, DMXL2, SEMA6D, TMOD3
10	11175405	11774243	rs732993392	rs314264762	8827	USH	FAM103A1, BTBD1, TM6SF1, HDGFL3, BNC1, SH3GL3, ADAMTSL3, SAXO2, EFL1
11	6120343	6836944	11:6120343:A:G	rs740251526	8624	USH	BRD7, ADCY7, PAPD5, CNEP1R1, ZNF423, CBLN1, HEATR3
11	7464039	8036516	rs315088219	11:8036516:C:A	8744	USH	ORC6, VPS35, SHCBP1, UQCRFS1, VSTM2B, POP4, PLEKHF1
11	8036551	8047283	11:8036551:G:A	11:8047283:T:C	136	USH	C19orf12
11	11095672	12253123	rs736080918	11:12253123:T:C	13149	USH	BEAN1, CDH5, CDH11
11	12253165	13174230	rs733038066	rs740306365	7417	USH	CDH8, gga-mir-6595
11	13174251	13475108	11:13174251:C:T	11:13475108:C:A	2818	USH	ADAMTS18
11	13475164	13838663	11:13475164:G:A	rs80646508	4131	USH	NUDT7, VAT1L, CLEC3A, WWOX
11	18618044	19629857	rs1059915471	11:19629857:G:T	3596	USH	NFAT5, NQO1, NOB1, WWP2, PSMD7, ZFHX3, DHX38, DHODH, IST1, ZNF821, ATXN1L, AP1G1, PHLPP2, MARVELD3, KARS, TERF2IP, ADAT1, GABARAPL2, CHST6, TMEM231, SNORD71, gga-mir-1699, gga-mir-140
12	11873115	13229409	rs317130898	rs739642178	16005	USH	SLC25A20, PRKAR2A, HTD2, PXK, PDHB, KCTD6, ACOX2, FAM107A, FAM3D, CFAP20DC, FHIT, PTPRG
12	13229413	13347463	rs739188881	rs733656776	1107	USH	C12H3orf14, FEZF2
12	13347472	13347487	12:13347472:A:G	12:13347487:C:G	5	USH	-
12	13347523	13393246	rs730924307	rs741430602	427	USH	-
12	16615667	17640579	rs15665931	12:17640579:A:G	13934	USH	SHQ1, GXYLT2, PPP4R2, PDZRN3 CNTN3, CHL1
12	17640594	18387379	12:17640594:G:A	rs734260607	10490	USH	CNTN6, CNTN4, IL5RA, TRNT1, CRBN
14	4161795	4321074	rs15006437	rs741292678	2322	USH	ACTB, FSCN1, RNF216, SMURF1, KPNA7, gga-mir-3533
14	5263914	5754781	rs15727752	14:5754781:A:T	6986	USH	SOX8, SSTR5, C1QTNF8, MAFIP
14	5754798	5762403	rs316988579	rs731101197	104	USH	-
14	5762405	5813526	14:5762405:T:C	rs317523109	829	USH	LMF1
14	6055175	6568985	rs1057946812	14:6568985:C:T	7620	USH	GFER, SYNGR3, ZNF598, NPW, NHERF2, NTHL1, TSC2, PKD1, RAB26, TRAF7, CASKIN1, HEXDCL, MLST8, BRICD5, PGP, E4F1, ZDHHC4, GRID2IP, SLC5A11, HS3ST6, MSRB1, RPL3L, NDUFB10, RPS2, TBL3, NOXO1
14	7808887	8062817	rs793949953	rs14076318	2968	USH	XYLT1
14	8062881	8813937	rs318233533	rs15735190	8774	USH	C14H16ORF52, VWA3A, SDR42E2, EEF2K, POLR3E, CDR2, METTL9, IGSF6, OTOA, KDELR2, RPS15A, ARL6IP1, SMG1, CLEC19A, SYT17, COQ7, TMC7, TMC5, GDE1, CCP110, ITPRIPL2, gga-mir-1644
14	9118484	10172206	rs1058695790	rs794291266	12149	USH	CARHSP1, PMM2, TMEM186, ABAT, METTL22, TMEM114, C16orf72, USP7, NUBP1, TEKT5, EMP2, GRIN2A
14	10172434	10172598	rs794346589	rs731927007	2	USH	-
14	10172609	10201532	14:10172609:C:T	rs317997229	307	USH	-
14	14404775	14976767	14:14404775:C:T	14:14976767:G:A	5813	USH	MCHR2, ACSM5, PDILT, GPR139, MRPS34, ROGDI, GPRC5B, VPS35L, GLYR1
15	7282599	8964827	rs316637371	rs316358266	24016	USH	PRR14L, PISD, SFI1, MN1, PITPNB, TTC28, CHEK2, HSCB, SLC2A11L5, CCDC117, XBP1, ZNRF3, KREMEN1, SBSPONL, SUSD2, GSC2, DGCR14, DGCR2, IGLL1, VPS29L, VPREB3, CHCHD10, MMP11, SMARCB1, DERL3, SLC2A11, SLC2A11L1, SLC2A11L4, MIF, DDX51, GSTT1L, DDTL, CABIN1, TBX6, CRKL, KLHL22, MED15, SMPD4, GGT2, LRRC75B, SNRPD3, GUCD1, UPB1, ADORA2A, SPECC1L, BCR, RAB36, RSPH14, GNAZ, SLC5A1, YWHAH, DEPDC5, gga-mir-66…
17	1872527	2124711	17:1872527:A:G	rs731922074	3968	USH	RGS3, POLE3, ALAD
17	2125115	2549075	17:2125115:C:A	17:2549075:G:C	5872	USH	DDR1, TUBB4B, ZMYND19, DPH7, PNPLA7, NSMF, ANAPC2, TOR4A, BSPRY, WDR31, PRPF4, CDC26, SLC31A1, FKBP15, LRSAM1, RPL12, MRPL41, SNORA65
19	3838641	4360073	rs739149278	19:4360073:G:A	7586	USH	MIS12, DERL2, DHX33, C1QBP, RPAIN, NUP88, RABEP1, IFT22, COL26A1, MYL10
20	5870145	6022895	20:5870145:T:C	rs317285373	1730	USH	TRHR3, OCSTAMP, SLC13A3, SLC2A10, EYA2
20	8869869	9475170	rs317171078	20:9475170:A:G	9004	USH	ARFGAP1, DEPTOR, COL20A1, CHRNA4, KCNQ2, EEF1A2, PPDPF, PTK6, MYT1, YTHDF1, BIRC7, NKAIN4, gga-mir-124a-2, gga-mir-12242, gga-mir-1746
20	13663465	13779678	rs794679372	rs731561287	620	USH	KCNG1, MOCS3, DPM1, ADNP
23	4771721	5222639	rs1059870915	rs732826039	5799	USH	DLGAP3, GJA4, GJB3, GJB5, CSMD2, C1orf94
28	4740302	5396354	28:4740302:T:G	28:5396354:T:C	2479	USH	CHERP, C19orf44, CALR3, PTPRS, KDM4B, KLF2, AP1M1, FAM32A, CIB3, RAB8A, TPM4, TINCR, DPP9, TNFAIP8L1, MED26, SLC35E1, UHRF1, TICAM1, FEM1A, PLIN3, gga-mir-7-3, gga-mir-6666, MYDGF
33	245471	1033316	33:245471:C:G	33:1033316:A:G	49	PRW	-
33	245535	1033647	33:245535:C:A	33:1033647:C:G	61	CRW	-
33	245535	1033347	33:245535:C:A	33:1033347:C:T	45	USH	-
