# Supplementary material for: Dissecting Selective Signatures and Candidate Genes in Grandparent Lines Subject to High Selection Pressure for Broiler Production and in a Local Russian Chicken Breed of Ushanka
Source: Genes (Basel). 2024 Apr 22;15(4):524. doi: 10.3390/genes15040524 (PMC11050503; doi:10.3390/genes15040524)
Supplement: Supplementary file 1 [file genes-15-00524-s001.zip › Supplementary Table S4a&b(ROH num & length).xlsx]

## Sheet: (a) mean_number
Supplementary Table S4a. Number and overall length of ROHs by ROH length class.
class	breed	N	values	sd	se	ci	%
0.5-2	CRW	20	120.65	29.5907	6.61668	13.8489	98.0894
2-4	CRW	20	2.15	1.38697	0.310136	0.649122	1.74797
4-8	CRW	20	0.2	0.410391	0.0917663	0.192069	0.162602
0.5-2	PRW	20	114.8	39.3922	8.80837	18.4361	98.5831
2-4	PRW	20	1.6	1.35336	0.30262	0.633391	1.37398
4-8	PRW	20	0.05	0.223607	0.05	0.104651	0.0429369
0.5-2	USH	17	388.176	38.9908	9.45665	20.0472	99.2928
2-4	USH	17	2.76471	1.88843	0.458012	0.970942	0.707192
4-8	USH	17	0	0	0	0	0

## Sheet: (b) mean_length
Supplementary Table S4b. Number and overall length of ROHs by ROH length class.
class	breed	N	Mean overall length, Mb	sd	se	ci	Coverage, Mb	Coverage, %
0.5-2	CRW	20	102.586	25.5445	5.71193	11.9552	95.723	93.31
2-4	CRW	19	6.86302	4.19632	0.962701	2.02256	1.92638	1.87782
4-8	CRW	4	4.93664	0.369297	0.184649	0.587634	4.93664	4.81219
0.5-2	PRW	20	95.2454	33.7178	7.53953	15.7804	89.6757	94.1522
2-4	PRW	15	5.56972	2.68899	0.694295	1.48911	1.31421	1.37981
4-8	PRW	1	4.25551				4.25551	4.46794
0.5-2	USH	17	338.754	38.3926	9.31159	19.7397	332.189	98.0621
2-4	USH	16	6.56472	4.07206	1.01802	2.16985	6.56472	1.9379
4-8	USH	0					0	0
