# Supplementary material for: Dissecting Selective Signatures and Candidate Genes in Grandparent Lines Subject to High Selection Pressure for Broiler Production and in a Local Russian Chicken Breed of Ushanka
Source: Genes (Basel). 2024 Apr 22;15(4):524. doi: 10.3390/genes15040524 (PMC11050503; doi:10.3390/genes15040524)
Supplement: Supplementary file 1 [file genes-15-00524-s001.zip › Supplementary Table S5 (QTLs).xlsx]

## Sheet: QTLs
Supplementary Table S5. Quantitative trait loci (QTLs) detected in identified regions.
chr	Region		Breed	Method	QTL_region		Trait	Base_Trait	QTL_ID	trait_ID	pubmed_ID	FlankMarker_rs	gene_ID	gene_ name
	pos_start	pos_end			start_pos_QTL	end_pos_QTL
1	53637245	54504503	PRW	hapflk	54456603	54456607	Exterior	Aggressive behavior	119893	2402	27485826	rs317606057	418081	CHST11
1	53637245	54504503	PRW	hapflk	53667357	53667361	Exterior	Aggressive behavior	119901	2402	27485826	rs13653575	374093	CRY1
1	53637245	54504503	PRW	hapflk	53689403	53689407	Exterior	Aggressive behavior	119902	2402	27485826	rs317194543	418068	TMEM263
1	53637245	54504503	PRW	hapflk	54010418	54010422	Exterior	Feather pigmentation	137117	2423	28639704	rs315576321	418074	NUAK1
1	53637245	54504503	PRW	hapflk	54017758	54017762	Exterior	Feather pigmentation	137118	2423	28639704	rs313638757	418074	NUAK1
1	53637245	54504503	PRW	hapflk	53993925	53993929	Production	Abdominal fat weight	193624	2041	30385857	rs312675081,rs312317108,rs312317108	-	-
1	53637245	54504503	PRW	hapflk	53997653	53997657	Production	Abdominal fat weight	193625	2041	30385857	rs15271198,rs15271198,rs315312994	-	-
1	53970001	54020000	CRW/PRW	zFst	54017758	54017762	Exterior	Feather pigmentation	137118	2423	28639704	rs313638757	418074	NUAK1
1	53970001	54020000	CRW/PRW	zFst	53993925	53993929	Production	Abdominal fat weight	193624	2041	30385857	rs312675081,rs312317108,rs312317108	-	-
1	53970001	54020000	CRW/PRW	zFst	53997653	53997657	Production	Abdominal fat weight	193625	2041	30385857	rs15271198,rs15271198,rs315312994	-	-
1	54410001	54460000	CRW/PRW	zFst	54456603	54456607	Exterior	Aggressive behavior	119893	2402	27485826	rs317606057	418081	CHST11
1	55266291	55354497	PRW	ROH	55282599	55282603	Exterior	Feather pecking	218959	2111	33004014	rs315377197	-	-
1	55280001	55330000	CRW/USH	zFst	55282599	55282603	Exterior	Feather pecking	218959	2111	33004014	rs315377197	-	-
2	92075780	93852482	USH	ROH	92129216	92129220	Production	Body weight gain	14422	7325	21198697	rs13639524	-	-
2	92075780	93852482	USH	ROH	92129216	92129220	Production	Abdominal fat percentage	14494	2168	17894563	rs13639524	-	-
2	92075780	93852482	USH	ROH	92945653	92945657	Production	Muscle dry matter content	24463	2307	23637794	rs16070025	-	-
2	92075780	93852482	USH	ROH	92188101	92188105	Production	Bursa of Fabricius weight	101210	2045	26853217	rs14220526	-	-
2	92075780	93852482	USH	ROH	93579870	93579874	Exterior	Feather pecking	219790	2111	33004014	rs739949745	-	-
4	74938839	75922825	USH	ROH	75382151	75382155	Production	Egg weight	16755	2003	22174844	rs15619223	-	-
4	74938839	75922825	USH	ROH	75417683	75417687	Production	Egg weight	16756	2003	22174844	rs14491017	-	-
4	74938839	75922825	USH	ROH	75436099	75436103	Production	Egg weight	19512	2003	22742506	rs14491030	-	-
4	74938839	75922825	USH	ROH	75436099	75436103	Production	Egg weight	19514	2003	22742506	rs14491030	-	-
4	74938839	75922825	USH	ROH	75436099	75436103	Production	Egg weight	19516	2003	22742506	rs14491030	-	-
4	74938839	75922825	USH	ROH	75389503	75389507	Production	Egg weight	19517	2003	22742506	rs14699480	-	-
4	74938839	75922825	USH	ROH	75436099	75436103	Production	Egg weight	19522	2003	22742506	rs14491030	-	-
4	74938839	75922825	USH	ROH	75389503	75389507	Production	Egg weight	19523	2003	22742506	rs14699480	-	-
4	74938839	75922825	USH	ROH	75211719	75211723	Production	Carcass weight	24391	2046	23637794	rs15619099	-	-
4	74938839	75922825	USH	ROH	75213333	75213337	Production	Carcass weight	24392	2046	23637794	rs316125117	-	-
4	74938839	75922825	USH	ROH	75543049	75543053	Production	Carcass weight	24393	2046	23637794	rs14707179	-	-
4	74938839	75922825	USH	ROH	75615421	75615425	Production	Carcass weight	24394	2046	23637794	rs16436561	-	-
4	74938839	75922825	USH	ROH	75787963	75787967	Production	Carcass weight	24395	2046	23637794	rs15619411	395631	LDB2
4	74938839	75922825	USH	ROH	75211719	75211723	Production	Carcass weight	24400	2046	23637794	rs15619099	-	-
4	74938839	75922825	USH	ROH	75213333	75213337	Production	Carcass weight	24401	2046	23637794	rs316125117	-	-
4	74938839	75922825	USH	ROH	75543049	75543053	Production	Carcass weight	24402	2046	23637794	rs14707179	-	-
4	74938839	75922825	USH	ROH	75615421	75615425	Production	Carcass weight	24403	2046	23637794	rs16436561	-	-
4	74938839	75922825	USH	ROH	75787963	75787967	Production	Carcass weight	24404	2046	23637794	rs15619411	395631	LDB2
4	74938839	75922825	USH	ROH	75436099	75436103	Production	Albumen height	24916	2008	24628796	rs14490890,rs14491030,rs14491074	-	-
4	74938839	75922825	USH	ROH	75436099	75436103	Production	Albumen height	24919	2008	24628796	rs14490890,rs14491030,rs14491074	-	-
4	74938839	75922825	USH	ROH	75436099	75436103	Production	Yolk weight	24937	2126	24628796	rs14490890,rs14491030,rs14491074	-	-
4	74938839	75922825	USH	ROH	75436099	75436103	Production	Yolk weight	24941	2126	24628796	rs14490890,rs14491030,rs14491074	-	-
4	74938839	75922825	USH	ROH	75436099	75436103	Production	Egg production rate	24944	2002	24628796	rs14490890,rs14491030,rs14491074	-	-
4	74938839	75922825	USH	ROH	75436099	75436103	Production	Body weight	24949	2042	24628796	rs14490890,rs14491030,rs14491074	-	-
4	74938839	75922825	USH	ROH	75909525	75909529	Production	Eggshell weight	57897	2016	26228268	rs315270535	-	-
4	74938839	75922825	USH	ROH	75917693	75917697	Production	Body weight	62149	2042	26365057	rs313973972	-	-
4	74938839	75922825	USH	ROH	75917693	75917697	Production	Body weight	62151	2042	26365057	rs313973972	-	-
4	74938839	75922825	USH	ROH	75917693	75917697	Production	Body weight	62157	2042	26365057	rs313973972	-	-
4	74938839	75922825	USH	ROH	75591450	75591454	Production	Body weight	62159	2042	26365057	rs14491071	-	-
4	74938839	75922825	USH	ROH	75917693	75917697	Production	Body weight	62160	2042	26365057	rs313973972	-	-
4	74938839	75922825	USH	ROH	75917693	75917697	Production	Body weight	62162	2042	26365057	rs313973972	-	-
4	74938839	75922825	USH	ROH	75591450	75591454	Production	Body weight	62164	2042	26365057	rs14491071	-	-
4	74938839	75922825	USH	ROH	75917693	75917697	Production	Body weight	62166	2042	26365057	rs313973972	-	-
4	74938839	75922825	USH	ROH	75377512	75377516	Production	Egg weight	63852	2003	26438435	rs312893965	-	-
4	74938839	75922825	USH	ROH	75377877	75377881	Production	Egg weight	63853	2003	26438435	rs314487178	-	-
4	74938839	75922825	USH	ROH	75377877	75377881	Production	Egg weight	63854	2003	26438435	rs314487178	-	-
4	74938839	75922825	USH	ROH	75384221	75384225	Production	Egg weight	63855	2003	26438435	rs314745738	-	-
4	74938839	75922825	USH	ROH	75419900	75419904	Production	Egg weight	63856	2003	26438435	rs316289892	-	-
4	74938839	75922825	USH	ROH	75427881	75427885	Production	Egg weight	63857	2003	26438435	rs15619270	-	-
4	74938839	75922825	USH	ROH	75427881	75427885	Production	Egg weight	63858	2003	26438435	rs15619270	-	-
4	74938839	75922825	USH	ROH	75427881	75427885	Production	Egg weight	63859	2003	26438435	rs15619270	-	-
4	74938839	75922825	USH	ROH	75427881	75427885	Production	Egg weight	63860	2003	26438435	rs15619270	-	-
4	74938839	75922825	USH	ROH	75427881	75427885	Production	Egg weight	63861	2003	26438435	rs15619270	-	-
4	74938839	75922825	USH	ROH	75427881	75427885	Production	Egg weight	63862	2003	26438435	rs15619270	-	-
4	74938839	75922825	USH	ROH	75427881	75427885	Production	Egg weight	63863	2003	26438435	rs15619270	-	-
4	74938839	75922825	USH	ROH	75427881	75427885	Production	Egg weight	63864	2003	26438435	rs15619270	-	-
4	74938839	75922825	USH	ROH	75435184	75435188	Production	Egg weight	63865	2003	26438435	rs315201454	-	-
4	74938839	75922825	USH	ROH	75435184	75435188	Production	Egg weight	63866	2003	26438435	rs315201454	-	-
4	74938839	75922825	USH	ROH	75435184	75435188	Production	Egg weight	63867	2003	26438435	rs315201454	-	-
4	74938839	75922825	USH	ROH	75435184	75435188	Production	Egg weight	63868	2003	26438435	rs315201454	-	-
4	74938839	75922825	USH	ROH	75435184	75435188	Production	Egg weight	63869	2003	26438435	rs315201454	-	-
4	74938839	75922825	USH	ROH	75435184	75435188	Production	Egg weight	63870	2003	26438435	rs315201454	-	-
4	74938839	75922825	USH	ROH	75435184	75435188	Production	Egg weight	63871	2003	26438435	rs315201454	-	-
4	74938839	75922825	USH	ROH	75435184	75435188	Production	Egg weight	63872	2003	26438435	rs315201454	-	-
4	74938839	75922825	USH	ROH	75436099	75436103	Production	Egg weight	63873	2003	26438435	rs14491030	-	-
4	74938839	75922825	USH	ROH	75436099	75436103	Production	Egg weight	63874	2003	26438435	rs14491030	-	-
4	74938839	75922825	USH	ROH	75436099	75436103	Production	Egg weight	63875	2003	26438435	rs14491030	-	-
4	74938839	75922825	USH	ROH	75436099	75436103	Production	Egg weight	63876	2003	26438435	rs14491030	-	-
4	74938839	75922825	USH	ROH	75436099	75436103	Production	Egg weight	63877	2003	26438435	rs14491030	-	-
4	74938839	75922825	USH	ROH	75436099	75436103	Production	Egg weight	63878	2003	26438435	rs14491030	-	-
4	74938839	75922825	USH	ROH	75436099	75436103	Production	Egg weight	63879	2003	26438435	rs14491030	-	-
4	74938839	75922825	USH	ROH	75436099	75436103	Production	Egg weight	63880	2003	26438435	rs14491030	-	-
4	74938839	75922825	USH	ROH	75445028	75445032	Production	Egg weight	63881	2003	26438435	rs316243629	-	-
4	74938839	75922825	USH	ROH	75445028	75445032	Production	Egg weight	63882	2003	26438435	rs316243629	-	-
4	74938839	75922825	USH	ROH	75445028	75445032	Production	Egg weight	63883	2003	26438435	rs316243629	-	-
4	74938839	75922825	USH	ROH	75445028	75445032	Production	Egg weight	63884	2003	26438435	rs316243629	-	-
4	74938839	75922825	USH	ROH	75445028	75445032	Production	Egg weight	63885	2003	26438435	rs316243629	-	-
4	74938839	75922825	USH	ROH	75445028	75445032	Production	Egg weight	63886	2003	26438435	rs316243629	-	-
4	74938839	75922825	USH	ROH	75445028	75445032	Production	Egg weight	63887	2003	26438435	rs316243629	-	-
4	74938839	75922825	USH	ROH	75445028	75445032	Production	Egg weight	63888	2003	26438435	rs316243629	-	-
4	74938839	75922825	USH	ROH	75603708	75603712	Production	Egg weight	63889	2003	26438435	rs14491074	-	-
4	74938839	75922825	USH	ROH	75603708	75603712	Production	Egg weight	63890	2003	26438435	rs14491074	-	-
4	74938839	75922825	USH	ROH	75603708	75603712	Production	Egg weight	63891	2003	26438435	rs14491074	-	-
4	74938839	75922825	USH	ROH	75603708	75603712	Production	Egg weight	63892	2003	26438435	rs14491074	-	-
4	74938839	75922825	USH	ROH	75603708	75603712	Production	Egg weight	63893	2003	26438435	rs14491074	-	-
4	74938839	75922825	USH	ROH	75608127	75608131	Production	Egg weight	63894	2003	26438435	rs16436548	-	-
4	74938839	75922825	USH	ROH	75615186	75615190	Production	Egg weight	63895	2003	26438435	rs312865541	-	-
4	74938839	75922825	USH	ROH	75616727	75616731	Production	Egg weight	63896	2003	26438435	rs315796839	-	-
4	74938839	75922825	USH	ROH	75621461	75621465	Production	Egg weight	63897	2003	26438435	rs317117927	-	-
4	74938839	75922825	USH	ROH	75645201	75645205	Production	Egg weight	63898	2003	26438435	rs312459969	-	-
4	74938839	75922825	USH	ROH	75651112	75651116	Production	Egg weight	63899	2003	26438435	rs314523951	-	-
4	74938839	75922825	USH	ROH	75759235	75759239	Production	Egg weight	63900	2003	26438435	rs312904783	-	-
4	74938839	75922825	USH	ROH	75909525	75909529	Production	Egg weight	63901	2003	26438435	rs315270535	-	-
4	74938839	75922825	USH	ROH	75909525	75909529	Production	Egg weight	63902	2003	26438435	rs315270535	-	-
4	74938839	75922825	USH	ROH	75909525	75909529	Production	Egg weight	63908	2003	26438435	rs315270535	-	-
4	74938839	75922825	USH	ROH	75436099	75436103	Production	Egg weight	63926	2003	26438435	rs14491030	-	-
4	74938839	75922825	USH	ROH	75435184	75435188	Production	Egg weight	63930	2003	26438435	rs315201454	-	-
4	74938839	75922825	USH	ROH	75445028	75445032	Production	Egg weight	63931	2003	26438435	rs316243629	-	-
4	74938839	75922825	USH	ROH	75456142	75456146	Production	Body weight	64510	2042	26498507	rs14710787	100859145	FAM184B
4	74938839	75922825	USH	ROH	75461133	75461137	Production	Body weight	64511	2042	26498507	rs16023603	100859145	FAM184B
4	74938839	75922825	USH	ROH	75651112	75651116	Production	Feed intake	64855	2040	26475174	rs314523951	-	-
4	74938839	75922825	USH	ROH	75651112	75651116	Production	Feed intake	64953	2040	26475174	rs314523951	-	-
4	74938839	75922825	USH	ROH	75461133	75461137	Production	Body weight	65696	2042	26634546	rs16023603	100859145	FAM184B
4	74938839	75922825	USH	ROH	75461133	75461137	Production	Body weight	65700	2042	26634546	rs16023603	100859145	FAM184B
4	74938839	75922825	USH	ROH	75461133	75461137	Production	Body weight	65703	2042	26634546	rs16023603	100859145	FAM184B
4	74938839	75922825	USH	ROH	75461133	75461137	Production	Body weight	65706	2042	26634546	rs16023603	100859145	FAM184B
4	74938839	75922825	USH	ROH	75498193	75498197	Production	Feet weight	95350	2217	26614681	rs731242270	-	-
4	74938839	75922825	USH	ROH	75498233	75498237	Production	Feet weight	95351	2217	26614681	rs736026342	-	-
4	74938839	75922825	USH	ROH	75498489	75498493	Production	Feet weight	95352	2217	26614681	rs733762928	-	-
4	74938839	75922825	USH	ROH	75590882	75590886	Production	Feet weight	95353	2217	26614681	rs739233957	-	-
4	74938839	75922825	USH	ROH	75629449	75629453	Production	Feet weight	95354	2217	26614681	rs316943436	-	-
4	74938839	75922825	USH	ROH	75590882	75590886	Production	Wing weight	95355	2061	26614681	rs739233957	-	-
4	74938839	75922825	USH	ROH	75211719	75211723	Production	Bursa of Fabricius weight	101224	2045	26853217	rs15619099	-	-
4	74938839	75922825	USH	ROH	75456142	75456146	Production	Body weight	135676	2042	28340264	rs14710787	-	-
4	74938839	75922825	USH	ROH	75461133	75461137	Production	Body weight	135677	2042	28340264	rs16023603	-	-
4	74938839	75922825	USH	ROH	75651112	75651116	Reproduction	Oviduct weight	150937	2432	29281706	rs314523951	-	-
4	74938839	75922825	USH	ROH	75427881	75427885	Reproduction	Oviduct length	151032	2431	29281706	rs15619270	-	-
4	74938839	75922825	USH	ROH	75435184	75435188	Reproduction	Oviduct length	151033	2431	29281706	rs315201454	-	-
4	74938839	75922825	USH	ROH	75436099	75436103	Reproduction	Oviduct length	151034	2431	29281706	rs14491030	-	-
4	74938839	75922825	USH	ROH	75445028	75445032	Reproduction	Oviduct length	151035	2431	29281706	rs316243629	-	-
4	74938839	75922825	USH	ROH	75603708	75603712	Reproduction	Oviduct length	151036	2431	29281706	rs14491074	-	-
4	74938839	75922825	USH	ROH	75009055	75009059	Reproduction	Oviduct weight	151103	2432	29281706	rs16436361	-	-
4	74938839	75922825	USH	ROH	75419900	75419904	Reproduction	Oviduct weight	151104	2432	29281706	rs316289892	-	-
4	74938839	75922825	USH	ROH	75427881	75427885	Reproduction	Oviduct weight	151105	2432	29281706	rs15619270	-	-
4	74938839	75922825	USH	ROH	75435184	75435188	Reproduction	Oviduct weight	151106	2432	29281706	rs315201454	-	-
4	74938839	75922825	USH	ROH	75436099	75436103	Reproduction	Oviduct weight	151107	2432	29281706	rs14491030	-	-
4	74938839	75922825	USH	ROH	75445028	75445032	Reproduction	Oviduct weight	151108	2432	29281706	rs316243629	-	-
4	74938839	75922825	USH	ROH	75603708	75603712	Reproduction	Oviduct weight	151109	2432	29281706	rs14491074	-	-
4	74938839	75922825	USH	ROH	75380295	75380299	Production	Average daily gain	160802	2174	30058133	rs315625415	422820	LCORL
4	74938839	75922825	USH	ROH	75401467	75401471	Production	Average daily gain	160803	2174	30058133	rs314961352	422820	LCORL
4	74938839	75922825	USH	ROH	75603708	75603712	Production	Average daily gain	160806	2174	30058133	rs14491074	-	-
4	74938839	75922825	USH	ROH	75767249	75767253	Production	Average daily gain	160807	2174	30058133	rs80645313	395631	LDB2
4	74938839	75922825	USH	ROH	75774119	75774123	Production	Average daily gain	160808	2174	30058133	rs16436656	395631	LDB2
4	74938839	75922825	USH	ROH	75826217	75826221	Production	Average daily gain	160809	2174	30058133	rs316842111	395631	LDB2
4	74938839	75922825	USH	ROH	75870217	75870221	Production	Average daily gain	160810	2174	30058133	rs314576528	395631	LDB2
4	74938839	75922825	USH	ROH	75882088	75882092	Production	Average daily gain	160811	2174	30058133	rs315097538	395631	LDB2
4	74938839	75922825	USH	ROH	75903671	75903675	Production	Average daily gain	160812	2174	30058133	rs317720366	395631	LDB2
4	74938839	75922825	USH	ROH	75603708	75603712	Production	Body weight	160823	2042	30058133	rs14491074	-	-
4	74938839	75922825	USH	ROH	75427881	75427885	Production	Heart weight	170510	2051	30056651	rs15619270	-	-
4	74938839	75922825	USH	ROH	75427881	75427885	Production	Liver weight	170511	2053	30056651	rs15619270	-	-
4	74938839	75922825	USH	ROH	75427881	75427885	Production	Proventriculus weight	170512	2207	30056651	rs15619270	-	-
4	74938839	75922825	USH	ROH	75427881	75427885	Production	Gizzard weight	170513	2050	30056651	rs15619270	-	-
4	74938839	75922825	USH	ROH	75435184	75435188	Production	Heart weight	170514	2051	30056651	rs315201454	422822	NGAPG
4	74938839	75922825	USH	ROH	75435184	75435188	Production	Liver weight	170515	2053	30056651	rs315201454	422822	NGAPG
4	74938839	75922825	USH	ROH	75435184	75435188	Production	Proventriculus weight	170516	2207	30056651	rs315201454	422822	NGAPG
4	74938839	75922825	USH	ROH	75435184	75435188	Production	Gizzard weight	170517	2050	30056651	rs315201454	422822	NGAPG
4	74938839	75922825	USH	ROH	75436099	75436103	Production	Heart weight	170518	2051	30056651	rs14491030	422822	NGAPG
4	74938839	75922825	USH	ROH	75436099	75436103	Production	Proventriculus weight	170519	2207	30056651	rs14491030	422822	NGAPG
4	74938839	75922825	USH	ROH	75436099	75436103	Production	Liver weight	170520	2053	30056651	rs14491030	-	-
4	74938839	75922825	USH	ROH	75436099	75436103	Production	Gizzard weight	170521	2050	30056651	rs14491030	422822	NGAPG
4	74938839	75922825	USH	ROH	75445028	75445032	Production	Heart weight	170522	2051	30056651	rs316243629	422822	NGAPG
4	74938839	75922825	USH	ROH	75445028	75445032	Production	Liver weight	170523	2053	30056651	rs316243629	422822	NGAPG
4	74938839	75922825	USH	ROH	75445028	75445032	Production	Proventriculus weight	170524	2207	30056651	rs316243629	422822	NGAPG
4	74938839	75922825	USH	ROH	75445028	75445032	Production	Gizzard weight	170525	2050	30056651	rs316243629	422822	NGAPG
4	74938839	75922825	USH	ROH	75603708	75603712	Production	Heart weight	170526	2051	30056651	rs14491074	-	-
4	74938839	75922825	USH	ROH	75603708	75603712	Production	Liver weight	170527	2053	30056651	rs14491074	-	-
4	74938839	75922825	USH	ROH	75603708	75603712	Production	Proventriculus weight	170528	2207	30056651	rs14491074	-	-
4	74938839	75922825	USH	ROH	75603708	75603712	Production	Gizzard weight	170529	2050	30056651	rs14491074	-	-
4	74938839	75922825	USH	ROH	75377877	75377881	Production	Tibia length	193678	2032	31794256	rs314487178	422820	LCORL
4	74938839	75922825	USH	ROH	75377877	75377881	Production	Tibia weight	193679	2196	31794256	rs314487178	422820	LCORL
4	74938839	75922825	USH	ROH	75436099	75436103	Production	Femur area	193680	2500	31794256	rs14491030	422822	NGAPG
4	74938839	75922825	USH	ROH	75436099	75436103	Production	Tibia length	193681	2032	31794256	rs14491030	422822	NGAPG
4	74938839	75922825	USH	ROH	75436099	75436103	Production	Femur length	193682	2161	31794256	rs14491030	422822	NGAPG
4	74938839	75922825	USH	ROH	75436099	75436103	Production	Shank length	193683	2182	31794256	rs14491030	422822	NGAPG
4	74938839	75922825	USH	ROH	75436099	75436103	Production	Tibia weight	193684	2196	31794256	rs14491030	422822	NGAPG
4	74938839	75922825	USH	ROH	75427881	75427885	Exterior	Feather density	194005	2501	31656738	rs15619270	-	-
4	74938839	75922825	USH	ROH	75603708	75603712	Exterior	Feather density	194011	2501	31656738	rs14491074	-	-
4	74938839	75922825	USH	ROH	75545486	75545490	Production	Body slope length	221841	2304	32989280	rs80599481	-	-
4	74938839	75922825	USH	ROH	75545486	75545490	Production	Body weight	221860	2042	32989280	rs80599481	-	-
4	74938839	75922825	USH	ROH	75510766	75510770	Production	Claw percentage	221871	7185	32989280	rs1057828311	425306	LAP3
4	74938839	75922825	USH	ROH	75510532	75510536	Production	Claw percentage	221922	7185	32989280	rs733509473	-	-
4	74938839	75922825	USH	ROH	75154658	75154662	Production	Claw weight	221971	2261	32989280	rs16436395	-	-
4	74938839	75922825	USH	ROH	75215236	75215240	Production	Claw weight	221977	2261	32989280	rs312433172	-	-
4	74938839	75922825	USH	ROH	75530451	75530455	Production	Claw weight	221978	2261	32989280	rs312608846	-	-
4	74938839	75922825	USH	ROH	75177252	75177256	Production	Claw weight	221997	2261	32989280	rs314605848	-	-
4	74938839	75922825	USH	ROH	75530447	75530451	Production	Claw weight	222017	2261	32989280	rs316795662	-	-
4	74938839	75922825	USH	ROH	75496334	75496338	Production	Claw weight	222038	2261	32989280	rs731009505	-	-
4	74938839	75922825	USH	ROH	75495965	75495969	Production	Claw weight	222049	2261	32989280	rs732491274	-	-
4	74938839	75922825	USH	ROH	75545486	75545490	Production	Claw weight	222093	2261	32989280	rs80599481	-	-
4	74938839	75922825	USH	ROH	75545486	75545490	Production	Carcass weight	222108	2046	32989280	rs80599481	-	-
4	74938839	75922825	USH	ROH	75215236	75215240	Production	Head weight	222130	2355	32989280	rs312433172	-	-
4	74938839	75922825	USH	ROH	75545486	75545490	Production	Drumstick and thigh weight	222173	2227	32989280	rs80599481	-	-
4	74938839	75922825	USH	ROH	75545486	75545490	Production	Carcass weight	222194	2046	32989280	rs80599481	-	-
4	74938839	75922825	USH	ROH	75215236	75215240	Production	Shank length	222227	2182	32989280	rs312433172	-	-
4	74938839	75922825	USH	ROH	75545486	75545490	Production	Shank length	222239	2182	32989280	rs80599481	-	-
4	74938839	75922825	USH	ROH	75732978	75732982	Production	Body weight	238962	2042	34706641	rs1059371152	-	-
4	74938839	75922825	USH	ROH	74976175	74976179	Production	Body weight	238964	2042	34706641	rs14714652	-	-
4	74938839	75922825	USH	ROH	75329574	75329578	Production	Body weight	238967	2042	34706641	rs16436491	-	-
4	74938839	75922825	USH	ROH	75047085	75047089	Production	Body weight	238972	2042	34706641	rs313046368	-	-
4	74938839	75922825	USH	ROH	75475172	75475176	Production	Body weight	238978	2042	34706641	rs315397301	-	-
4	74938839	75922825	USH	ROH	75632855	75632859	Production	Body weight	238979	2042	34706641	rs315448779	-	-
4	74938839	75922825	USH	ROH	75803105	75803109	Production	Body weight	238980	2042	34706641	rs315959805	-	-
4	74938839	75922825	USH	ROH	75885056	75885060	Production	Body weight	238981	2042	34706641	rs316070373	-	-
4	74938839	75922825	USH	ROH	75418048	75418052	Production	Body weight	238982	2042	34706641	rs316119236	-	-
4	74938839	75922825	USH	ROH	75422163	75422167	Production	Body weight	238984	2042	34706641	rs316556136	-	-
4	74938839	75922825	USH	ROH	75536844	75536848	Production	Body weight	238986	2042	34706641	rs317100352	-	-
4	74938839	75922825	USH	ROH	75536850	75536854	Production	Body weight	238987	2042	34706641	rs317127564	-	-
4	74938839	75922825	USH	ROH	74959600	74959604	Production	Body weight	238991	2042	34706641	rs317419663	-	-
4	74938839	75922825	USH	ROH	75536057	75536061	Production	Body weight	238992	2042	34706641	rs317957821	-	-
4	74938839	75922825	USH	ROH	75709326	75709330	Production	Body weight	238995	2042	34706641	rs731381089	-	-
4	74938839	75922825	USH	ROH	75732962	75732966	Production	Body weight	238999	2042	34706641	rs734233929	-	-
4	74938839	75922825	USH	ROH	75446047	75446051	Production	Body weight	239001	2042	34706641	rs735695882	-	-
4	74938839	75922825	USH	ROH	75513342	75513346	Production	Body weight	239002	2042	34706641	rs737245916	-	-
4	74938839	75922825	USH	ROH	75572989	75572993	Production	Body weight	239004	2042	34706641	rs738297906	-	-
4	74938839	75922825	USH	ROH	75479329	75479333	Production	Body weight	239005	2042	34706641	rs738402168	-	-
4	74938839	75922825	USH	ROH	75309189	75309193	Production	Body weight	239008	2042	34706641	rs80576223	-	-
4	74938839	75922825	USH	ROH	75560959	75560963	Production	Body weight	239009	2042	34706641	rs80762609	-	-
4	74938839	75922825	USH	ROH	75753142	75753146	Production	Body weight	239010	2042	34706641	rs80779309	-	-
4	74938839	75922825	USH	ROH	75732978	75732982	Production	Body weight	239012	2042	34706641	rs1059371152	-	-
4	74938839	75922825	USH	ROH	75175288	75175292	Production	Body weight	239018	2042	34706641	rs13774789	-	-
4	74938839	75922825	USH	ROH	75900209	75900213	Production	Body weight	239021	2042	34706641	rs14491260	-	-
4	74938839	75922825	USH	ROH	75479336	75479340	Production	Body weight	239025	2042	34706641	rs14707370	-	-
4	74938839	75922825	USH	ROH	74976175	74976179	Production	Body weight	239026	2042	34706641	rs14714652	-	-
4	74938839	75922825	USH	ROH	75535890	75535894	Production	Body weight	239027	2042	34706641	rs14739738	-	-
4	74938839	75922825	USH	ROH	75329574	75329578	Production	Body weight	239034	2042	34706641	rs16436491	-	-
4	74938839	75922825	USH	ROH	75565728	75565732	Production	Body weight	239038	2042	34706641	rs16756269	-	-
4	74938839	75922825	USH	ROH	75565742	75565746	Production	Body weight	239039	2042	34706641	rs16756270	-	-
4	74938839	75922825	USH	ROH	75341640	75341644	Production	Body weight	239043	2042	34706641	rs312278071	-	-
4	74938839	75922825	USH	ROH	75132456	75132460	Production	Body weight	239051	2042	34706641	rs312729365	-	-
4	74938839	75922825	USH	ROH	75047085	75047089	Production	Body weight	239055	2042	34706641	rs313046368	-	-
4	74938839	75922825	USH	ROH	75132559	75132563	Production	Body weight	239058	2042	34706641	rs313198668	-	-
4	74938839	75922825	USH	ROH	75302356	75302360	Production	Body weight	239067	2042	34706641	rs313875036	-	-
4	74938839	75922825	USH	ROH	75177252	75177256	Production	Body weight	239075	2042	34706641	rs314605848	-	-
4	74938839	75922825	USH	ROH	75475172	75475176	Production	Body weight	239084	2042	34706641	rs315397301	-	-
4	74938839	75922825	USH	ROH	75632855	75632859	Production	Body weight	239085	2042	34706641	rs315448779	-	-
4	74938839	75922825	USH	ROH	75803105	75803109	Production	Body weight	239094	2042	34706641	rs315959805	-	-
4	74938839	75922825	USH	ROH	75885056	75885060	Production	Body weight	239096	2042	34706641	rs316070373	-	-
4	74938839	75922825	USH	ROH	75418048	75418052	Production	Body weight	239097	2042	34706641	rs316119236	-	-
4	74938839	75922825	USH	ROH	75422163	75422167	Production	Body weight	239101	2042	34706641	rs316556136	-	-
4	74938839	75922825	USH	ROH	75181129	75181133	Production	Body weight	239107	2042	34706641	rs316815094	-	-
4	74938839	75922825	USH	ROH	75273158	75273162	Production	Body weight	239113	2042	34706641	rs317025671	-	-
4	74938839	75922825	USH	ROH	75536844	75536848	Production	Body weight	239114	2042	34706641	rs317100352	-	-
4	74938839	75922825	USH	ROH	75536850	75536854	Production	Body weight	239116	2042	34706641	rs317127564	-	-
4	74938839	75922825	USH	ROH	74976332	74976336	Production	Body weight	239120	2042	34706641	rs317234308	-	-
4	74938839	75922825	USH	ROH	75208198	75208202	Production	Body weight	239121	2042	34706641	rs317319108	-	-
4	74938839	75922825	USH	ROH	75710073	75710077	Production	Body weight	239123	2042	34706641	rs317355904	-	-
4	74938839	75922825	USH	ROH	74959600	74959604	Production	Body weight	239125	2042	34706641	rs317419663	-	-
4	74938839	75922825	USH	ROH	75086915	75086919	Production	Body weight	239128	2042	34706641	rs317601203	-	-
4	74938839	75922825	USH	ROH	75757085	75757089	Production	Body weight	239129	2042	34706641	rs317643478	-	-
4	74938839	75922825	USH	ROH	75536057	75536061	Production	Body weight	239130	2042	34706641	rs317957821	-	-
4	74938839	75922825	USH	ROH	75677553	75677557	Production	Body weight	239138	2042	34706641	rs731035544	-	-
4	74938839	75922825	USH	ROH	75309449	75309453	Production	Body weight	239140	2042	34706641	rs731102016	-	-
4	74938839	75922825	USH	ROH	75709326	75709330	Production	Body weight	239145	2042	34706641	rs731381089	-	-
4	74938839	75922825	USH	ROH	75100550	75100554	Production	Body weight	239148	2042	34706641	rs731460862	-	-
4	74938839	75922825	USH	ROH	75737961	75737965	Production	Body weight	239152	2042	34706641	rs731959893	-	-
4	74938839	75922825	USH	ROH	75584923	75584927	Production	Body weight	239157	2042	34706641	rs732504163	-	-
4	74938839	75922825	USH	ROH	75573124	75573128	Production	Body weight	239163	2042	34706641	rs732855554	-	-
4	74938839	75922825	USH	ROH	75732962	75732966	Production	Body weight	239170	2042	34706641	rs734233929	-	-
4	74938839	75922825	USH	ROH	75100562	75100566	Production	Body weight	239173	2042	34706641	rs734389102	-	-
4	74938839	75922825	USH	ROH	75446047	75446051	Production	Body weight	239181	2042	34706641	rs735695882	-	-
4	74938839	75922825	USH	ROH	75083454	75083458	Production	Body weight	239188	2042	34706641	rs737133006	-	-
4	74938839	75922825	USH	ROH	75513342	75513346	Production	Body weight	239189	2042	34706641	rs737245916	-	-
4	74938839	75922825	USH	ROH	75445630	75445634	Production	Body weight	239193	2042	34706641	rs737961050	-	-
4	74938839	75922825	USH	ROH	75244239	75244243	Production	Body weight	239195	2042	34706641	rs738125011	-	-
4	74938839	75922825	USH	ROH	75572989	75572993	Production	Body weight	239196	2042	34706641	rs738297906	-	-
4	74938839	75922825	USH	ROH	75479329	75479333	Production	Body weight	239198	2042	34706641	rs738402168	-	-
4	74938839	75922825	USH	ROH	75488285	75488289	Production	Body weight	239200	2042	34706641	rs738469542	-	-
4	74938839	75922825	USH	ROH	75323191	75323195	Production	Body weight	239204	2042	34706641	rs738991889	-	-
4	74938839	75922825	USH	ROH	75753413	75753417	Production	Body weight	239209	2042	34706641	rs739903861	-	-
4	74938839	75922825	USH	ROH	75513231	75513235	Production	Body weight	239216	2042	34706641	rs740878900	-	-
4	74938839	75922825	USH	ROH	75470269	75470273	Production	Body weight	239219	2042	34706641	rs741688132	-	-
4	74938839	75922825	USH	ROH	75709985	75709989	Production	Body weight	239223	2042	34706641	rs80564409	-	-
4	74938839	75922825	USH	ROH	75309189	75309193	Production	Body weight	239224	2042	34706641	rs80576223	-	-
4	74938839	75922825	USH	ROH	75677534	75677538	Production	Body weight	239225	2042	34706641	rs80606901	-	-
4	74938839	75922825	USH	ROH	75681398	75681402	Production	Body weight	239227	2042	34706641	rs80629814	-	-
4	74938839	75922825	USH	ROH	75346520	75346524	Production	Body weight	239231	2042	34706641	rs80691090	-	-
4	74938839	75922825	USH	ROH	75346355	75346359	Production	Body weight	239234	2042	34706641	rs80726973	-	-
4	74938839	75922825	USH	ROH	75560959	75560963	Production	Body weight	239235	2042	34706641	rs80762609	-	-
4	74938839	75922825	USH	ROH	75753142	75753146	Production	Body weight	239236	2042	34706641	rs80779309	-	-
4	74938839	75922825	USH	ROH	75732978	75732982	Production	Average daily gain	239238	2174	34706641	rs1059371152	-	-
4	74938839	75922825	USH	ROH	75175288	75175292	Production	Average daily gain	239242	2174	34706641	rs13774789	-	-
4	74938839	75922825	USH	ROH	75900209	75900213	Production	Average daily gain	239245	2174	34706641	rs14491260	-	-
4	74938839	75922825	USH	ROH	75479336	75479340	Production	Average daily gain	239250	2174	34706641	rs14707370	-	-
4	74938839	75922825	USH	ROH	74976175	74976179	Production	Average daily gain	239251	2174	34706641	rs14714652	-	-
4	74938839	75922825	USH	ROH	75535890	75535894	Production	Average daily gain	239252	2174	34706641	rs14739738	-	-
4	74938839	75922825	USH	ROH	75329574	75329578	Production	Average daily gain	239258	2174	34706641	rs16436491	-	-
4	74938839	75922825	USH	ROH	75565728	75565732	Production	Average daily gain	239262	2174	34706641	rs16756269	-	-
4	74938839	75922825	USH	ROH	75565742	75565746	Production	Average daily gain	239263	2174	34706641	rs16756270	-	-
4	74938839	75922825	USH	ROH	75341640	75341644	Production	Average daily gain	239267	2174	34706641	rs312278071	-	-
4	74938839	75922825	USH	ROH	75132456	75132460	Production	Average daily gain	239274	2174	34706641	rs312729365	-	-
4	74938839	75922825	USH	ROH	75047085	75047089	Production	Average daily gain	239278	2174	34706641	rs313046368	-	-
4	74938839	75922825	USH	ROH	75132559	75132563	Production	Average daily gain	239281	2174	34706641	rs313198668	-	-
4	74938839	75922825	USH	ROH	75302356	75302360	Production	Average daily gain	239290	2174	34706641	rs313875036	-	-
4	74938839	75922825	USH	ROH	75177252	75177256	Production	Average daily gain	239296	2174	34706641	rs314605848	-	-
4	74938839	75922825	USH	ROH	75475172	75475176	Production	Average daily gain	239305	2174	34706641	rs315397301	-	-
4	74938839	75922825	USH	ROH	75632855	75632859	Production	Average daily gain	239306	2174	34706641	rs315448779	-	-
4	74938839	75922825	USH	ROH	75803105	75803109	Production	Average daily gain	239314	2174	34706641	rs315959805	-	-
4	74938839	75922825	USH	ROH	75885056	75885060	Production	Average daily gain	239315	2174	34706641	rs316070373	-	-
4	74938839	75922825	USH	ROH	75418048	75418052	Production	Average daily gain	239316	2174	34706641	rs316119236	-	-
4	74938839	75922825	USH	ROH	75422163	75422167	Production	Average daily gain	239320	2174	34706641	rs316556136	-	-
4	74938839	75922825	USH	ROH	75181129	75181133	Production	Average daily gain	239326	2174	34706641	rs316815094	-	-
4	74938839	75922825	USH	ROH	75273158	75273162	Production	Average daily gain	239333	2174	34706641	rs317025671	-	-
4	74938839	75922825	USH	ROH	75536844	75536848	Production	Average daily gain	239334	2174	34706641	rs317100352	-	-
4	74938839	75922825	USH	ROH	75536850	75536854	Production	Average daily gain	239336	2174	34706641	rs317127564	-	-
4	74938839	75922825	USH	ROH	74976332	74976336	Production	Average daily gain	239340	2174	34706641	rs317234308	-	-
4	74938839	75922825	USH	ROH	75208198	75208202	Production	Average daily gain	239341	2174	34706641	rs317319108	-	-
4	74938839	75922825	USH	ROH	75710073	75710077	Production	Average daily gain	239343	2174	34706641	rs317355904	-	-
4	74938839	75922825	USH	ROH	74959600	74959604	Production	Average daily gain	239344	2174	34706641	rs317419663	-	-
4	74938839	75922825	USH	ROH	75086915	75086919	Production	Average daily gain	239347	2174	34706641	rs317601203	-	-
4	74938839	75922825	USH	ROH	75757085	75757089	Production	Average daily gain	239348	2174	34706641	rs317643478	-	-
4	74938839	75922825	USH	ROH	75536057	75536061	Production	Average daily gain	239349	2174	34706641	rs317957821	-	-
4	74938839	75922825	USH	ROH	75677553	75677557	Production	Average daily gain	239356	2174	34706641	rs731035544	-	-
4	74938839	75922825	USH	ROH	75309449	75309453	Production	Average daily gain	239358	2174	34706641	rs731102016	-	-
4	74938839	75922825	USH	ROH	75709326	75709330	Production	Average daily gain	239363	2174	34706641	rs731381089	-	-
4	74938839	75922825	USH	ROH	75100550	75100554	Production	Average daily gain	239365	2174	34706641	rs731460862	-	-
4	74938839	75922825	USH	ROH	75470304	75470308	Production	Average daily gain	239366	2174	34706641	rs731468653	-	-
4	74938839	75922825	USH	ROH	75737961	75737965	Production	Average daily gain	239370	2174	34706641	rs731959893	-	-
4	74938839	75922825	USH	ROH	75584923	75584927	Production	Average daily gain	239373	2174	34706641	rs732504163	-	-
4	74938839	75922825	USH	ROH	75732962	75732966	Production	Average daily gain	239384	2174	34706641	rs734233929	-	-
4	74938839	75922825	USH	ROH	75100562	75100566	Production	Average daily gain	239386	2174	34706641	rs734389102	-	-
4	74938839	75922825	USH	ROH	75446047	75446051	Production	Average daily gain	239393	2174	34706641	rs735695882	-	-
4	74938839	75922825	USH	ROH	75083454	75083458	Production	Average daily gain	239400	2174	34706641	rs737133006	-	-
4	74938839	75922825	USH	ROH	75513342	75513346	Production	Average daily gain	239401	2174	34706641	rs737245916	-	-
4	74938839	75922825	USH	ROH	75445630	75445634	Production	Average daily gain	239404	2174	34706641	rs737961050	-	-
4	74938839	75922825	USH	ROH	75244239	75244243	Production	Average daily gain	239406	2174	34706641	rs738125011	-	-
4	74938839	75922825	USH	ROH	75572989	75572993	Production	Average daily gain	239407	2174	34706641	rs738297906	-	-
4	74938839	75922825	USH	ROH	75479329	75479333	Production	Average daily gain	239409	2174	34706641	rs738402168	-	-
4	74938839	75922825	USH	ROH	75488285	75488289	Production	Average daily gain	239411	2174	34706641	rs738469542	-	-
4	74938839	75922825	USH	ROH	75323191	75323195	Production	Average daily gain	239414	2174	34706641	rs738991889	-	-
4	74938839	75922825	USH	ROH	75753413	75753417	Production	Average daily gain	239418	2174	34706641	rs739903861	-	-
4	74938839	75922825	USH	ROH	75513231	75513235	Production	Average daily gain	239425	2174	34706641	rs740878900	-	-
4	74938839	75922825	USH	ROH	75470269	75470273	Production	Average daily gain	239428	2174	34706641	rs741688132	-	-
4	74938839	75922825	USH	ROH	75709985	75709989	Production	Average daily gain	239430	2174	34706641	rs80564409	-	-
4	74938839	75922825	USH	ROH	75309189	75309193	Production	Average daily gain	239431	2174	34706641	rs80576223	-	-
4	74938839	75922825	USH	ROH	75677534	75677538	Production	Average daily gain	239432	2174	34706641	rs80606901	-	-
4	74938839	75922825	USH	ROH	75346520	75346524	Production	Average daily gain	239437	2174	34706641	rs80691090	-	-
4	74938839	75922825	USH	ROH	75346355	75346359	Production	Average daily gain	239440	2174	34706641	rs80726973	-	-
4	74938839	75922825	USH	ROH	75560959	75560963	Production	Average daily gain	239441	2174	34706641	rs80762609	-	-
4	74938839	75922825	USH	ROH	75753142	75753146	Production	Average daily gain	239442	2174	34706641	rs80779309	-	-
4	74938839	75922825	USH	ROH	75732978	75732982	Production	Feed conversion ratio	239444	2144	34706641	rs1059371152	-	-
4	74938839	75922825	USH	ROH	75900209	75900213	Production	Feed conversion ratio	239449	2144	34706641	rs14491260	-	-
4	74938839	75922825	USH	ROH	74976175	74976179	Production	Feed conversion ratio	239451	2144	34706641	rs14714652	-	-
4	74938839	75922825	USH	ROH	75535890	75535894	Production	Feed conversion ratio	239452	2144	34706641	rs14739738	-	-
4	74938839	75922825	USH	ROH	75329574	75329578	Production	Feed conversion ratio	239454	2144	34706641	rs16436491	-	-
4	74938839	75922825	USH	ROH	75565728	75565732	Production	Feed conversion ratio	239458	2144	34706641	rs16756269	-	-
4	74938839	75922825	USH	ROH	75565742	75565746	Production	Feed conversion ratio	239459	2144	34706641	rs16756270	-	-
4	74938839	75922825	USH	ROH	75341640	75341644	Production	Feed conversion ratio	239462	2144	34706641	rs312278071	-	-
4	74938839	75922825	USH	ROH	75047085	75047089	Production	Feed conversion ratio	239467	2144	34706641	rs313046368	-	-
4	74938839	75922825	USH	ROH	75302356	75302360	Production	Feed conversion ratio	239471	2144	34706641	rs313875036	-	-
4	74938839	75922825	USH	ROH	75475172	75475176	Production	Feed conversion ratio	239481	2144	34706641	rs315397301	-	-
4	74938839	75922825	USH	ROH	75803105	75803109	Production	Feed conversion ratio	239483	2144	34706641	rs315959805	-	-
4	74938839	75922825	USH	ROH	75885056	75885060	Production	Feed conversion ratio	239484	2144	34706641	rs316070373	-	-
4	74938839	75922825	USH	ROH	75418048	75418052	Production	Feed conversion ratio	239485	2144	34706641	rs316119236	-	-
4	74938839	75922825	USH	ROH	75422163	75422167	Production	Feed conversion ratio	239489	2144	34706641	rs316556136	-	-
4	74938839	75922825	USH	ROH	75536844	75536848	Production	Feed conversion ratio	239494	2144	34706641	rs317100352	-	-
4	74938839	75922825	USH	ROH	75536850	75536854	Production	Feed conversion ratio	239495	2144	34706641	rs317127564	-	-
4	74938839	75922825	USH	ROH	75710073	75710077	Production	Feed conversion ratio	239500	2144	34706641	rs317355904	-	-
4	74938839	75922825	USH	ROH	74959600	74959604	Production	Feed conversion ratio	239501	2144	34706641	rs317419663	-	-
4	74938839	75922825	USH	ROH	75086915	75086919	Production	Feed conversion ratio	239503	2144	34706641	rs317601203	-	-
4	74938839	75922825	USH	ROH	75757085	75757089	Production	Feed conversion ratio	239504	2144	34706641	rs317643478	-	-
4	74938839	75922825	USH	ROH	75536057	75536061	Production	Feed conversion ratio	239505	2144	34706641	rs317957821	-	-
4	74938839	75922825	USH	ROH	75677553	75677557	Production	Feed conversion ratio	239508	2144	34706641	rs731035544	-	-
4	74938839	75922825	USH	ROH	75100550	75100554	Production	Feed conversion ratio	239513	2144	34706641	rs731460862	-	-
4	74938839	75922825	USH	ROH	75573124	75573128	Production	Feed conversion ratio	239516	2144	34706641	rs732855554	-	-
4	74938839	75922825	USH	ROH	75732962	75732966	Production	Feed conversion ratio	239519	2144	34706641	rs734233929	-	-
4	74938839	75922825	USH	ROH	75100562	75100566	Production	Feed conversion ratio	239520	2144	34706641	rs734389102	-	-
4	74938839	75922825	USH	ROH	75446047	75446051	Production	Feed conversion ratio	239523	2144	34706641	rs735695882	-	-
4	74938839	75922825	USH	ROH	75513342	75513346	Production	Feed conversion ratio	239527	2144	34706641	rs737245916	-	-
4	74938839	75922825	USH	ROH	75445630	75445634	Production	Feed conversion ratio	239528	2144	34706641	rs737961050	-	-
4	74938839	75922825	USH	ROH	75572989	75572993	Production	Feed conversion ratio	239530	2144	34706641	rs738297906	-	-
4	74938839	75922825	USH	ROH	75479329	75479333	Production	Feed conversion ratio	239532	2144	34706641	rs738402168	-	-
4	74938839	75922825	USH	ROH	75488285	75488289	Production	Feed conversion ratio	239534	2144	34706641	rs738469542	-	-
4	74938839	75922825	USH	ROH	75323191	75323195	Production	Feed conversion ratio	239536	2144	34706641	rs738991889	-	-
4	74938839	75922825	USH	ROH	74942042	74942046	Production	Feed conversion ratio	239540	2144	34706641	rs740733896	-	-
4	74938839	75922825	USH	ROH	75513231	75513235	Production	Feed conversion ratio	239542	2144	34706641	rs740878900	-	-
4	74938839	75922825	USH	ROH	75470269	75470273	Production	Feed conversion ratio	239545	2144	34706641	rs741688132	-	-
4	74938839	75922825	USH	ROH	75709985	75709989	Production	Feed conversion ratio	239548	2144	34706641	rs80564409	-	-
4	74938839	75922825	USH	ROH	75309189	75309193	Production	Feed conversion ratio	239549	2144	34706641	rs80576223	-	-
4	74938839	75922825	USH	ROH	75677534	75677538	Production	Feed conversion ratio	239550	2144	34706641	rs80606901	-	-
4	74938839	75922825	USH	ROH	75346520	75346524	Production	Feed conversion ratio	239552	2144	34706641	rs80691090	-	-
4	74938839	75922825	USH	ROH	75346355	75346359	Production	Feed conversion ratio	239554	2144	34706641	rs80726973	-	-
4	74938839	75922825	USH	ROH	75560959	75560963	Production	Feed conversion ratio	239555	2144	34706641	rs80762609	-	-
4	74938839	75922825	USH	ROH	75753142	75753146	Production	Feed conversion ratio	239556	2144	34706641	rs80779309	-	-
4	74938839	75922825	USH	ROH	75581998	75582002	Production	Body weight	260984	2042	35958311	rs318196131	-	-
4	74938839	75922825	USH	ROH	75581998	75582002	Production	Body weight	261398	2042	35958311	rs318196131	-	-
4	75380001	75430000	PRW/USH	zFst	75382151	75382155	Production	Egg weight	16755	2003	22174844	rs15619223	-	-
4	75380001	75430000	PRW/USH	zFst	75389503	75389507	Production	Egg weight	19517	2003	22742506	rs14699480	-	-
4	75380001	75430000	PRW/USH	zFst	75389503	75389507	Production	Egg weight	19523	2003	22742506	rs14699480	-	-
4	75380001	75430000	PRW/USH	zFst	75384221	75384225	Production	Egg weight	63855	2003	26438435	rs314745738	-	-
4	75380001	75430000	PRW/USH	zFst	75380295	75380299	Production	Average daily gain	160802	2174	30058133	rs315625415	422820	LCORL
4	75390001	75440000	PRW/USH	zFst	75436099	75436103	Production	Egg weight	19514	2003	22742506	rs14491030	-	-
4	75390001	75440000	PRW/USH	zFst	75436099	75436103	Production	Body weight	24949	2042	24628796	rs14490890,rs14491030,rs14491074	-	-
4	75400001	75450000	PRW/USH	zFst	75436099	75436103	Production	Body weight	24949	2042	24628796	rs14490890,rs14491030,rs14491074	-	-
4	75400001	75450000	PRW/USH	zFst	75401467	75401471	Production	Average daily gain	160803	2174	30058133	rs314961352	422820	LCORL
4	75400001	75450000	PRW/USH	zFst	75445028	75445032	Production	Heart weight	170522	2051	30056651	rs316243629	422822	NGAPG
4	75410001	75460000	PRW/USH	zFst	75417683	75417687	Production	Egg weight	16756	2003	22174844	rs14491017	-	-
4	75410001	75460000	PRW/USH	zFst	75436099	75436103	Production	Egg weight	19512	2003	22742506	rs14491030	-	-
4	75410001	75460000	PRW/USH	zFst	75436099	75436103	Production	Egg weight	19516	2003	22742506	rs14491030	-	-
4	75410001	75460000	PRW/USH	zFst	75436099	75436103	Production	Egg weight	19522	2003	22742506	rs14491030	-	-
4	75410001	75460000	PRW/USH	zFst	75436099	75436103	Production	Albumen height	24916	2008	24628796	rs14490890,rs14491030,rs14491074	-	-
4	75410001	75460000	PRW/USH	zFst	75436099	75436103	Production	Albumen height	24919	2008	24628796	rs14490890,rs14491030,rs14491074	-	-
4	75410001	75460000	PRW/USH	zFst	75436099	75436103	Production	Yolk weight	24937	2126	24628796	rs14490890,rs14491030,rs14491074	-	-
4	75410001	75460000	PRW/USH	zFst	75436099	75436103	Production	Yolk weight	24941	2126	24628796	rs14490890,rs14491030,rs14491074	-	-
4	75410001	75460000	PRW/USH	zFst	75436099	75436103	Production	Egg production rate	24944	2002	24628796	rs14490890,rs14491030,rs14491074	-	-
4	75410001	75460000	PRW/USH	zFst	75436099	75436103	Production	Body weight	24949	2042	24628796	rs14490890,rs14491030,rs14491074	-	-
4	75410001	75460000	PRW/USH	zFst	75419900	75419904	Production	Egg weight	63856	2003	26438435	rs316289892	-	-
4	75410001	75460000	PRW/USH	zFst	75427881	75427885	Production	Egg weight	63857	2003	26438435	rs15619270	-	-
4	75410001	75460000	PRW/USH	zFst	75427881	75427885	Production	Egg weight	63858	2003	26438435	rs15619270	-	-
4	75410001	75460000	PRW/USH	zFst	75427881	75427885	Production	Egg weight	63859	2003	26438435	rs15619270	-	-
4	75410001	75460000	PRW/USH	zFst	75427881	75427885	Production	Egg weight	63860	2003	26438435	rs15619270	-	-
4	75410001	75460000	PRW/USH	zFst	75427881	75427885	Production	Egg weight	63861	2003	26438435	rs15619270	-	-
4	75410001	75460000	PRW/USH	zFst	75427881	75427885	Production	Egg weight	63862	2003	26438435	rs15619270	-	-
4	75410001	75460000	PRW/USH	zFst	75427881	75427885	Production	Egg weight	63863	2003	26438435	rs15619270	-	-
4	75410001	75460000	PRW/USH	zFst	75427881	75427885	Production	Egg weight	63864	2003	26438435	rs15619270	-	-
4	75410001	75460000	PRW/USH	zFst	75435184	75435188	Production	Egg weight	63865	2003	26438435	rs315201454	-	-
4	75410001	75460000	PRW/USH	zFst	75435184	75435188	Production	Egg weight	63866	2003	26438435	rs315201454	-	-
4	75410001	75460000	PRW/USH	zFst	75435184	75435188	Production	Egg weight	63867	2003	26438435	rs315201454	-	-
4	75410001	75460000	PRW/USH	zFst	75435184	75435188	Production	Egg weight	63868	2003	26438435	rs315201454	-	-
4	75410001	75460000	PRW/USH	zFst	75435184	75435188	Production	Egg weight	63869	2003	26438435	rs315201454	-	-
4	75410001	75460000	PRW/USH	zFst	75435184	75435188	Production	Egg weight	63870	2003	26438435	rs315201454	-	-
4	75410001	75460000	PRW/USH	zFst	75435184	75435188	Production	Egg weight	63871	2003	26438435	rs315201454	-	-
4	75410001	75460000	PRW/USH	zFst	75435184	75435188	Production	Egg weight	63872	2003	26438435	rs315201454	-	-
4	75410001	75460000	PRW/USH	zFst	75436099	75436103	Production	Egg weight	63873	2003	26438435	rs14491030	-	-
4	75410001	75460000	PRW/USH	zFst	75436099	75436103	Production	Egg weight	63874	2003	26438435	rs14491030	-	-
4	75410001	75460000	PRW/USH	zFst	75436099	75436103	Production	Egg weight	63875	2003	26438435	rs14491030	-	-
4	75410001	75460000	PRW/USH	zFst	75436099	75436103	Production	Egg weight	63876	2003	26438435	rs14491030	-	-
4	75410001	75460000	PRW/USH	zFst	75436099	75436103	Production	Egg weight	63877	2003	26438435	rs14491030	-	-
4	75410001	75460000	PRW/USH	zFst	75436099	75436103	Production	Egg weight	63878	2003	26438435	rs14491030	-	-
4	75410001	75460000	PRW/USH	zFst	75436099	75436103	Production	Egg weight	63879	2003	26438435	rs14491030	-	-
4	75410001	75460000	PRW/USH	zFst	75436099	75436103	Production	Egg weight	63880	2003	26438435	rs14491030	-	-
4	75410001	75460000	PRW/USH	zFst	75445028	75445032	Production	Egg weight	63881	2003	26438435	rs316243629	-	-
4	75410001	75460000	PRW/USH	zFst	75445028	75445032	Production	Egg weight	63882	2003	26438435	rs316243629	-	-
4	75410001	75460000	PRW/USH	zFst	75445028	75445032	Production	Egg weight	63883	2003	26438435	rs316243629	-	-
4	75410001	75460000	PRW/USH	zFst	75445028	75445032	Production	Egg weight	63884	2003	26438435	rs316243629	-	-
4	75410001	75460000	PRW/USH	zFst	75445028	75445032	Production	Egg weight	63885	2003	26438435	rs316243629	-	-
4	75410001	75460000	PRW/USH	zFst	75445028	75445032	Production	Egg weight	63886	2003	26438435	rs316243629	-	-
4	75410001	75460000	PRW/USH	zFst	75445028	75445032	Production	Egg weight	63887	2003	26438435	rs316243629	-	-
4	75410001	75460000	PRW/USH	zFst	75445028	75445032	Production	Egg weight	63888	2003	26438435	rs316243629	-	-
4	75410001	75460000	PRW/USH	zFst	75436099	75436103	Production	Egg weight	63926	2003	26438435	rs14491030	-	-
4	75410001	75460000	PRW/USH	zFst	75435184	75435188	Production	Egg weight	63930	2003	26438435	rs315201454	-	-
4	75410001	75460000	PRW/USH	zFst	75445028	75445032	Production	Egg weight	63931	2003	26438435	rs316243629	-	-
4	75410001	75460000	PRW/USH	zFst	75456142	75456146	Production	Body weight	64510	2042	26498507	rs14710787	100859145	FAM184B
4	75410001	75460000	PRW/USH	zFst	75456142	75456146	Production	Body weight	135676	2042	28340264	rs14710787	-	-
4	75410001	75460000	PRW/USH	zFst	75427881	75427885	Reproduction	Oviduct length	151032	2431	29281706	rs15619270	-	-
4	75410001	75460000	PRW/USH	zFst	75435184	75435188	Reproduction	Oviduct length	151033	2431	29281706	rs315201454	-	-
4	75410001	75460000	PRW/USH	zFst	75436099	75436103	Reproduction	Oviduct length	151034	2431	29281706	rs14491030	-	-
4	75410001	75460000	PRW/USH	zFst	75445028	75445032	Reproduction	Oviduct length	151035	2431	29281706	rs316243629	-	-
4	75410001	75460000	PRW/USH	zFst	75419900	75419904	Reproduction	Oviduct weight	151104	2432	29281706	rs316289892	-	-
4	75410001	75460000	PRW/USH	zFst	75427881	75427885	Reproduction	Oviduct weight	151105	2432	29281706	rs15619270	-	-
4	75410001	75460000	PRW/USH	zFst	75435184	75435188	Reproduction	Oviduct weight	151106	2432	29281706	rs315201454	-	-
4	75410001	75460000	PRW/USH	zFst	75436099	75436103	Reproduction	Oviduct weight	151107	2432	29281706	rs14491030	-	-
4	75410001	75460000	PRW/USH	zFst	75445028	75445032	Reproduction	Oviduct weight	151108	2432	29281706	rs316243629	-	-
4	75410001	75460000	PRW/USH	zFst	75427881	75427885	Production	Heart weight	170510	2051	30056651	rs15619270	-	-
4	75410001	75460000	PRW/USH	zFst	75427881	75427885	Production	Liver weight	170511	2053	30056651	rs15619270	-	-
4	75410001	75460000	PRW/USH	zFst	75427881	75427885	Production	Proventriculus weight	170512	2207	30056651	rs15619270	-	-
4	75410001	75460000	PRW/USH	zFst	75427881	75427885	Production	Gizzard weight	170513	2050	30056651	rs15619270	-	-
4	75410001	75460000	PRW/USH	zFst	75435184	75435188	Production	Heart weight	170514	2051	30056651	rs315201454	422822	NGAPG
4	75410001	75460000	PRW/USH	zFst	75435184	75435188	Production	Liver weight	170515	2053	30056651	rs315201454	422822	NGAPG
4	75410001	75460000	PRW/USH	zFst	75435184	75435188	Production	Proventriculus weight	170516	2207	30056651	rs315201454	422822	NGAPG
4	75410001	75460000	PRW/USH	zFst	75435184	75435188	Production	Gizzard weight	170517	2050	30056651	rs315201454	422822	NGAPG
4	75410001	75460000	PRW/USH	zFst	75436099	75436103	Production	Heart weight	170518	2051	30056651	rs14491030	422822	NGAPG
4	75410001	75460000	PRW/USH	zFst	75436099	75436103	Production	Proventriculus weight	170519	2207	30056651	rs14491030	422822	NGAPG
4	75410001	75460000	PRW/USH	zFst	75436099	75436103	Production	Liver weight	170520	2053	30056651	rs14491030	-	-
4	75410001	75460000	PRW/USH	zFst	75436099	75436103	Production	Gizzard weight	170521	2050	30056651	rs14491030	422822	NGAPG
4	75410001	75460000	PRW/USH	zFst	75445028	75445032	Production	Heart weight	170522	2051	30056651	rs316243629	422822	NGAPG
4	75410001	75460000	PRW/USH	zFst	75445028	75445032	Production	Liver weight	170523	2053	30056651	rs316243629	422822	NGAPG
4	75410001	75460000	PRW/USH	zFst	75445028	75445032	Production	Proventriculus weight	170524	2207	30056651	rs316243629	422822	NGAPG
4	75410001	75460000	PRW/USH	zFst	75445028	75445032	Production	Gizzard weight	170525	2050	30056651	rs316243629	422822	NGAPG
4	75410001	75460000	PRW/USH	zFst	75436099	75436103	Production	Femur area	193680	2500	31794256	rs14491030	422822	NGAPG
4	75410001	75460000	PRW/USH	zFst	75436099	75436103	Production	Tibia length	193681	2032	31794256	rs14491030	422822	NGAPG
4	75410001	75460000	PRW/USH	zFst	75436099	75436103	Production	Femur length	193682	2161	31794256	rs14491030	422822	NGAPG
4	75410001	75460000	PRW/USH	zFst	75436099	75436103	Production	Shank length	193683	2182	31794256	rs14491030	422822	NGAPG
4	75410001	75460000	PRW/USH	zFst	75436099	75436103	Production	Tibia weight	193684	2196	31794256	rs14491030	422822	NGAPG
4	75410001	75460000	PRW/USH	zFst	75427881	75427885	Exterior	Feather density	194005	2501	31656738	rs15619270	-	-
4	75410001	75460000	PRW/USH	zFst	75418048	75418052	Production	Body weight	238982	2042	34706641	rs316119236	-	-
4	75410001	75460000	PRW/USH	zFst	75422163	75422167	Production	Body weight	238984	2042	34706641	rs316556136	-	-
4	75410001	75460000	PRW/USH	zFst	75446047	75446051	Production	Body weight	239001	2042	34706641	rs735695882	-	-
4	75410001	75460000	PRW/USH	zFst	75418048	75418052	Production	Body weight	239097	2042	34706641	rs316119236	-	-
4	75410001	75460000	PRW/USH	zFst	75422163	75422167	Production	Body weight	239101	2042	34706641	rs316556136	-	-
4	75410001	75460000	PRW/USH	zFst	75446047	75446051	Production	Body weight	239181	2042	34706641	rs735695882	-	-
4	75410001	75460000	PRW/USH	zFst	75445630	75445634	Production	Body weight	239193	2042	34706641	rs737961050	-	-
4	75410001	75460000	PRW/USH	zFst	75418048	75418052	Production	Average daily gain	239316	2174	34706641	rs316119236	-	-
4	75410001	75460000	PRW/USH	zFst	75422163	75422167	Production	Average daily gain	239320	2174	34706641	rs316556136	-	-
4	75410001	75460000	PRW/USH	zFst	75446047	75446051	Production	Average daily gain	239393	2174	34706641	rs735695882	-	-
4	75410001	75460000	PRW/USH	zFst	75445630	75445634	Production	Average daily gain	239404	2174	34706641	rs737961050	-	-
4	75410001	75460000	PRW/USH	zFst	75418048	75418052	Production	Feed conversion ratio	239485	2144	34706641	rs316119236	-	-
4	75410001	75460000	PRW/USH	zFst	75422163	75422167	Production	Feed conversion ratio	239489	2144	34706641	rs316556136	-	-
4	75410001	75460000	PRW/USH	zFst	75446047	75446051	Production	Feed conversion ratio	239523	2144	34706641	rs735695882	-	-
4	75410001	75460000	PRW/USH	zFst	75445630	75445634	Production	Feed conversion ratio	239528	2144	34706641	rs737961050	-	-
5	30830001	30880000	CRW/PRW	zFst	30878687	30878691	Production	Body weight	153752	2042	27799342	rs14530756	-	-
5	30830467	31703025	CRW	ROH	30923522	30923526	Exterior	Feather pecking	15657	2111	20496162	rs13585357	-	-
5	30830467	31703025	CRW	ROH	30923522	30923526	Exterior	Feather pecking	15658	2111	20496162	rs13585357	-	-
5	30830467	31703025	CRW	ROH	30878687	30878691	Production	Body weight	153752	2042	27799342	rs14530756	-	-
7	9281277	10029387	USH	ROH	9339109	9339113	Exterior	Receiving feather pecking	137372	2112	28158968	rs15839686	-	-
7	9281277	10029387	USH	ROH	9808273	9808277	Exterior	Receiving feather pecking	137373	2112	28158968	rs15840596	-	-
7	9281277	10029387	USH	ROH	9386569	9386573	Production	Feed conversion ratio	139407	2144	27174137	rs15839764	-	-
7	9281277	10029387	USH	ROH	9454257	9454261	Production	Feed intake	221671	2040	33633287	rs313616546	-	-
10	5355392	6359502	USH	ROH	6278037	6278041	Physiology	Blood carbon dioxide level	71169	2370	27076351	rs317071731	-	-
10	5355392	6359502	USH	ROH	6316262	6316266	Production	Bursa of Fabricius weight	101238	2045	26853217	rs15570463	415393	LRRC49
10	5355392	6359502	USH	ROH	5568665	5568669	Exterior	Feather pecking	219107	2111	33004014	rs14944609	-	-
10	5355392	6359502	USH	ROH	5899576	5899580	Production	Shank diameter	263112	2208	36436378	rs317962110,rs315729689,rs314527320	-	-
14	8062881	8813937	USH	ROH	8414124	8414128	Production	Spleen weight	21747	2057	ISU0068	rs317484645	351	APP
14	8062881	8813937	USH	ROH	8151725	8151729	Health	Campylobacter intestinal colonization	96109	2378	27090510	rs15010208	-	-
14	8062881	8813937	USH	ROH	8512844	8512848	Health	Campylobacter intestinal colonization	96110	2378	27090510	rs14076550	-	-
14	8062881	8813937	USH	ROH	8774797	8774801	Production	Egg number	224054	2004	34376144	rs317717587	-	-
14	8062881	8813937	USH	ROH	8796986	8796990	Production	Egg number	224055	2004	34376144	rs315615241	-	-
14	8062881	8813937	USH	ROH	8304192	8304196	Production	Body weight	257003	2042	34979907	rs315620991	-	-
14	8062881	8813937	USH	ROH	8461796	8461800	Production	Abdominal fat percentage	263320	2168	36552358	rs316613317	416608	SYT17
14	8790001	8840000	PRW/USH	zFst	8834159	8834163	Production	Drumstick and thigh percentage	19234	2228	22582286	rs14076962	395871	RAC1
14	8790001	8840000	PRW/USH	zFst	8834159	8834163	Production	Drumstick and thigh muscle weight	19235	2243	22582286	rs14076962	395871	RAC1
14	8790001	8840000	PRW/USH	zFst	8834159	8834163	Production	Drumstick and thigh muscle percentage	19236	2247	22582286	rs14076962	395871	RAC1
14	8790001	8840000	PRW/USH	zFst	8796986	8796990	Production	Egg number	224055	2004	34376144	rs315615241	-	-
28	4740302	5396354	USH	ROH	4781837	4781841	Physiology	CO2 partial pressure	71137	2366	27076351	rs317333808	-	-
28	4740302	5396354	USH	ROH	4875675	4875679	Production	Feed conversion ratio	139519	2144	27174137	rs313738242	-	-
28	4740302	5396354	USH	ROH	4807579	4807583	Physiology	VLDL cholesterol level	170818	2461	31037768	rs16212557	-	-
28	4740302	5396354	USH	ROH	4824287	4824291	Physiology	VLDL cholesterol level	170819	2461	31037768	rs15252252	-	-
28	4740302	5396354	USH	ROH	5279638	5279642	Production	Abdominal fat weight	193631	2041	30385857	rs314594719,rs314073448,rs13726311	-	-
28	4740302	5396354	USH	ROH	4789959	4789963	Production	Carcass fat content	193647	2313	30385857	rs314594719,rs314212680,rs13726311	-	-
28	4740302	5396354	USH	ROH	5387563	5387567	Production	Body weight	256348	2042	33811218	rs316709322	-	-
28	4740302	5396354	USH	ROH	4896229	4896233	Production	Chest width	257062	2194	34979907	rs314916166	-	-
28	4780001	4830000	CRW/USH	zFst	4781837	4781841	Physiology	CO2 partial pressure	71137	2366	27076351	rs317333808	-	-
28	4780001	4830000	CRW/USH	zFst	4789959	4789963	Production	Carcass fat content	193647	2313	30385857	rs314594719,rs314212680,rs13726311	-	-
28	4800001	4850000	CRW/USH	zFst	4807579	4807583	Physiology	VLDL cholesterol level	170818	2461	31037768	rs16212557	-	-
28	4800001	4850000	CRW/USH	zFst	4824287	4824291	Physiology	VLDL cholesterol level	170819	2461	31037768	rs15252252	-	-
28	4860001	4910000	CRW/USH	zFst	4896229	4896233	Production	Chest width	257062	2194	34979907	rs314916166	-	-
28	4870001	4920000	CRW/USH	zFst	4875675	4875679	Production	Feed conversion ratio	139519	2144	27174137	rs313738242	-	-
