# Supplementary figures and images for: Dissecting Selective Signatures and Candidate Genes in Grandparent Lines Subject to High Selection Pressure for Broiler Production and in a Local Russian Chicken Breed of Ushanka
Source: MDPI journal article supplement (doi:10.3390/genes15040524), 2024-04-22

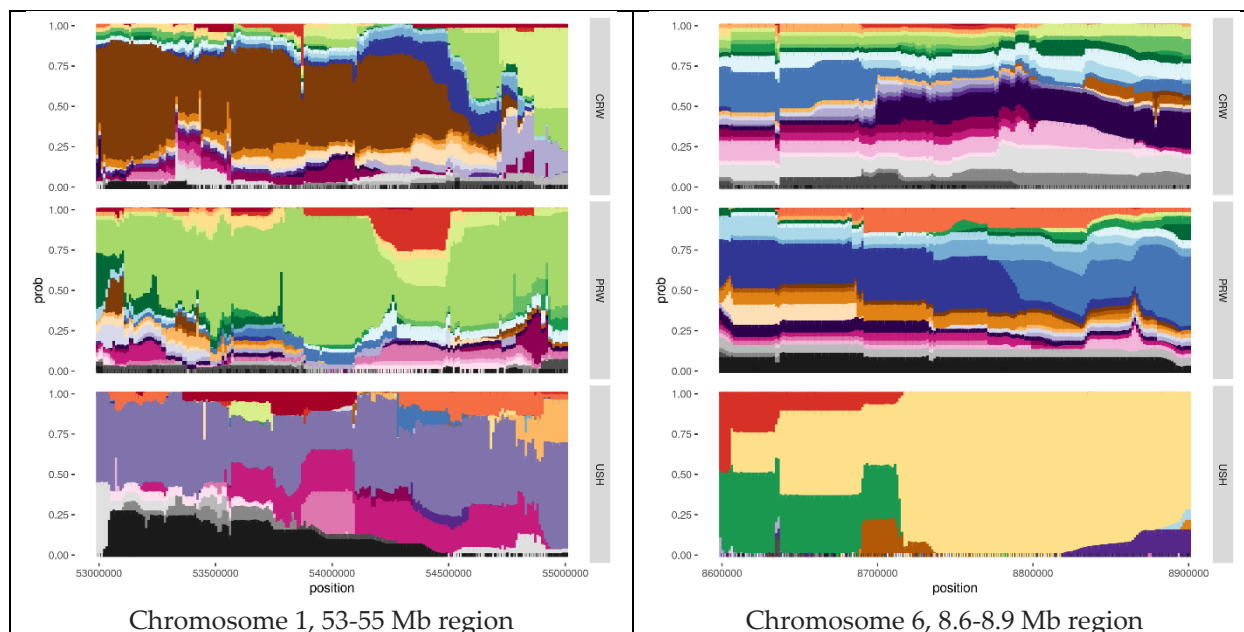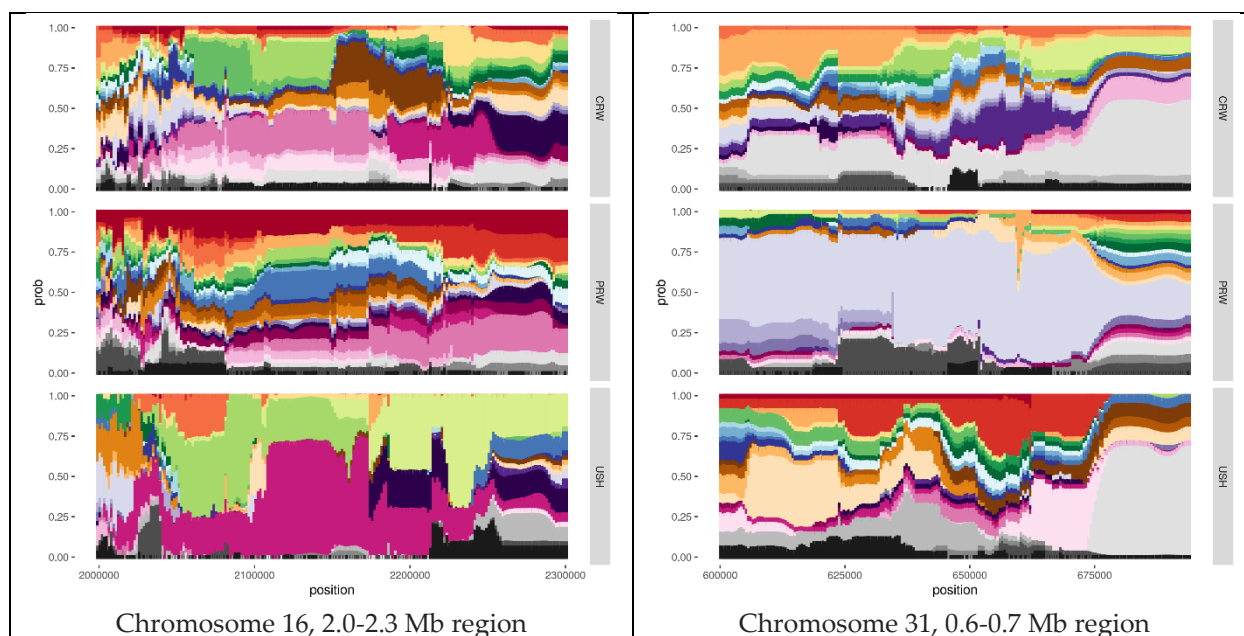

**Supplementary Figure S4.** Plots of the chromosome areas containing the hapFLK regions.

Supplement: s1 [file s1]
